# Supplementary material for: Transcriptome-wide N 6-Methyladenosine Methylome Profiling Reveals m6A Regulation of Skeletal Myoblast Differentiation in Cattle (Bos taurus)
Source: Front Cell Dev Biol. 2021 Dec 6;9:785380. doi: 10.3389/fcell.2021.785380 (PMC8685427; doi:10.3389/fcell.2021.785380)
Supplement: Supplementary file 10 [file DataSheet5.XLSX]

## Sheet: KEGG analysis for DMGs
Term	Database	ID	Input number	Background number	P-Value	Corrected P-Value	Input	Hyperlink
Herpes simplex virus 1 infection	KEGG PATHWAY	bta05168	50	405	1.31e-09	3.76e-07	ZFP90|ZFP30|NFKBIA|ZNF597|IFNAR1|ZNF596|IFNGR1|CGAS|ZNF10|ZNF354A|ZNF382|ZNF354C|ZNF605|TSC2|PIK3CB|MAP3K7|CARD9|JAK2|ZNF432|PML|ZNF470|ZNF268|ZNF514|ZNF667|ZNF184|ZNF248|TRAF3|TRAF5|ZNF200|ZNF793|ZNF189|ZNF684|ZNF25|ZNF606|ZNF565|ZNF677|ZNF175|TAB1|ZNF177|ZNF484|ZNF713|TLR2|ZNF350|ZNF705A|ZNF420|PIK3CA|ZNF853|ZNF132|RHEB|ZNF19	http://www.genome.jp/kegg-bin/show_pathway?bta05168/bta:538504%09red/bta:506182%09red/bta:506621%09red/bta:539365%09red/bta:524106%09red/bta:782885%09red/bta:618217%09red/bta:444866%09red/bta:523334%09red/bta:515674%09red/bta:282306%09red/bta:100125413%09red/bta:537103%09red/bta:517948%09red/bta:112441496%09red/bta:540816%09red/bta:784893%09red/bta:101907389%09red/bta:101905074%09red/bta:529146%0…
Ubiquitin mediated proteolysis	KEGG PATHWAY	bta04120	20	140	1.8e-05	0.00256758	BRCA1|UBE2Q1|UBOX5|SKP2|UBE2M|UBE2O|CDC27|BIRC6|UBE3A|ANAPC10|SYVN1|DET1|HERC4|RNF7|PML|CUL5|MDM2|ANAPC5|WWP2|KLHL9	http://www.genome.jp/kegg-bin/show_pathway?bta04120/bta:514445%09red/bta:353120%09red/bta:540537%09red/bta:533336%09red/bta:505133%09red/bta:519018%09red/bta:540660%09red/bta:533136%09red/bta:541005%09red/bta:515595%09red/bta:510331%09red/bta:512457%09red/bta:508358%09red/bta:613343%09red/bta:534211%09red/bta:767834%09red/bta:540378%09red/bta:100138545%09red/bta:783986%09red/bta:789422%09red
Pathways in cancer	KEGG PATHWAY	bta05200	47	539	3.25e-05	0.0030984	IL23A|CDKN1B|EP300|NFKBIA|FZD9|ITGA6|TRAF3|RUNX1T1|IFNGR1|POLK|KITLG|NCOA3|FZD3|SKP2|FZD5|PIK3CA|PIK3CB|DCC|RB1|ARHGEF1|GLI3|GLI1|JAK2|JAG2|NFKB2|IGF2|TGFBR1|BRCA2|TRAF5|PIM1|GNB3|PML|PPARD|FLT3LG|STAT3|MDM2|LAMC1|GNAQ|GSTM1|TCF7L1|TCF7L2|NOTCH3|MET|IFNAR1|GNA11|LPAR2|PTCH1	http://www.genome.jp/kegg-bin/show_pathway?bta05200/bta:506182%09red/bta:538536%09red/bta:515303%09red/bta:509748%09red/bta:519018%09red/bta:281240%09red/bta:541218%09red/bta:282306%09red/bta:536654%09red/bta:445419%09red/bta:513377%09red/bta:532572%09red/bta:517948%09red/bta:535043%09red/bta:511022%09red/bta:783879%09red/bta:538628%09red/bta:507069%09red/bta:282257%09red/bta:785371%09red/bta:508…
Fanconi anemia pathway	KEGG PATHWAY	bta03460	10	52	0.000283863	0.0193247	BRCA1|BRCA2|BLM|MUS81|FANCE|REV3L|POLK|RMI1|POLI|TOP3B	http://www.genome.jp/kegg-bin/show_pathway?bta03460/bta:541218%09red/bta:534148%09red/bta:513464%09red/bta:537418%09red/bta:507069%09red/bta:515909%09red/bta:353120%09red/bta:528432%09red/bta:517422%09red/bta:614063%09red
Lysine degradation	KEGG PATHWAY	bta00310	11	64	0.000337844	0.0193247	KMT2B|KMT2A|SETD2|KMT2D|DOT1L|PHYKPL|PRDM6|EHMT2|PRDM2|HYKK|NSD2	http://www.genome.jp/kegg-bin/show_pathway?bta00310/bta:508330%09red/bta:530270%09red/bta:539860%09red/bta:506805%09red/bta:785776%09red/bta:519857%09red/bta:540769%09red/bta:537241%09red/bta:789222%09red/bta:514062%09red/bta:510442%09red
Thyroid hormone signaling pathway	KEGG PATHWAY	bta04919	14	118	0.00161762	0.0689102	NCOA2|NCOA3|EP300|SLC9A1|PIK3CA|PIK3CB|NOTCH3|MED13|MED4|MED16|MDM2|RHEB|TSC2|ATP2A1	http://www.genome.jp/kegg-bin/show_pathway?bta04919/bta:515299%09red/bta:789485%09red/bta:100298629%09red/bta:112446776%09red/bta:528204%09red/bta:504985%09red/bta:317654%09red/bta:518117%09red/bta:508162%09red/bta:282306%09red/bta:517948%09red/bta:540378%09red/bta:523707%09red/bta:524868%09red
Metabolic pathways	KEGG PATHWAY	bta01100	91	1468	0.00175285	0.0689102	CKM|GGPS1|ACP1|B3GNT5|PIK3CA|PIK3CB|PYGB|NADK2|PYGM|PFAS|NPR2|HMGCL|EXTL2|HMGCR|GPT|PDE8A|INPP5F|PLD3|GSTM1|PGS1|PTGDS|CYP2U1|PNPLA2|B4GALT1|CHST9|HYKK|COX7A1|GALNT7|GYS1|ALDH4A1|GALK1|HLCS|TCIRG1|ATP6V0A1|MINPP1|MSMO1|ADSS|AMPD3|AMPD2|TK1|SMPD4|MBOAT1|QRSL1|ADI1|NT5C3A|AMDHD2|BDH1|NAT1|ENOPH1|NUDT12|UAP1L1|RRM1|GALC|ALG10|GCAT|FADS2|AK9|B3GALNT1|ACOX2|PIP5K1B|PIP5K1A|AGPAT5|ANPEP|B4GALNT1|COX5B|…	http://www.genome.jp/kegg-bin/show_pathway?bta01100/bta:541284%09red/bta:617720%09red/bta:281174%09red/bta:281177%09red/bta:538147%09red/bta:535227%09red/bta:521637%09red/bta:507119%09red/bta:504481%09red/bta:540527%09red/bta:286822%09red/bta:524529%09red/bta:281781%09red/bta:100125224%09red/bta:506381%09red/bta:533428%09red/bta:783525%09red/bta:613932%09red/bta:317658%09red/bta:517948%09red/bta:…
Breast cancer	KEGG PATHWAY	bta05224	16	150	0.00213584	0.0689102	BRCA1|NCOA3|FZD3|FZD5|SHC4|PIK3CA|PIK3CB|TCF7L1|TCF7L2|NOTCH3|BRCA2|RB1|FZD9|JAG2|NFKB2|POLK	http://www.genome.jp/kegg-bin/show_pathway?bta05224/bta:507069%09red/bta:517948%09red/bta:524734%09red/bta:534712%09red/bta:515303%09red/bta:789485%09red/bta:538536%09red/bta:526392%09red/bta:353120%09red/bta:541218%09red/bta:282306%09red/bta:521364%09red/bta:540481%09red/bta:445419%09red/bta:523707%09red/bta:517405%09red
Axon guidance	KEGG PATHWAY	bta04360	18	180	0.00224716	0.0689102	EFNB3|PLXNB1|SEMA3E|RYK|PARD6G|PIK3CA|PIK3CB|EFNA4|DCC|EPHA7|PTCH1|SEMA4C|MET|BMPR1B|FZD3|BOC|PAK2|RGMA	http://www.genome.jp/kegg-bin/show_pathway?bta04360/bta:535644%09red/bta:280855%09red/bta:512018%09red/bta:617714%09red/bta:615879%09red/bta:781353%09red/bta:526028%09red/bta:513673%09red/bta:616798%09red/bta:518756%09red/bta:407128%09red/bta:537176%09red/bta:282306%09red/bta:538797%09red/bta:517948%09red/bta:445419%09red/bta:539292%09red/bta:520994%09red
Insulin resistance	KEGG PATHWAY	bta04931	13	110	0.00240945	0.0689102	RPS6KA1|STAT3|PPP1R3A|MLXIPL|PIK3CA|PIK3CB|NFKBIA|CD36|GYS1|PYGB|MLXIP|SLC27A4|PYGM	http://www.genome.jp/kegg-bin/show_pathway?bta04931/bta:783217%09red/bta:533908%09red/bta:784877%09red/bta:788534%09red/bta:282291%09red/bta:327664%09red/bta:786335%09red/bta:514427%09red/bta:281052%09red/bta:282306%09red/bta:508541%09red/bta:517948%09red/bta:505560%09red
Hepatitis B	KEGG PATHWAY	bta05161	17	172	0.00327279	0.0810133	NFATC1|TGFBR1|TRAF3|STAT3|PIK3CA|PIK3CB|NFKBIA|MAP3K7|RB1|MAP2K3|IFNAR1|JAK2|EGR3|YWHAB|TLR2|EP300|TAB1	http://www.genome.jp/kegg-bin/show_pathway?bta05161/bta:525246%09red/bta:286863%09red/bta:282291%09red/bta:519958%09red/bta:281534%09red/bta:506182%09red/bta:516039%09red/bta:534712%09red/bta:529146%09red/bta:282257%09red/bta:282306%09red/bta:282382%09red/bta:508541%09red/bta:517948%09red/bta:511224%09red/bta:112446776%09red/bta:526233%09red
Basal cell carcinoma	KEGG PATHWAY	bta05217	9	63	0.00355685	0.0810133	FZD3|FZD5|FZD9|TCF7L1|TCF7L2|GLI3|GLI1|PTCH1|POLK	http://www.genome.jp/kegg-bin/show_pathway?bta05217/bta:538536%09red/bta:515303%09red/bta:541218%09red/bta:517588%09red/bta:785371%09red/bta:521364%09red/bta:540481%09red/bta:445419%09red/bta:520994%09red
Viral carcinogenesis	KEGG PATHWAY	bta05203	21	241	0.00462776	0.0810133	ACTN1|UBE3A|SKP2|TRAF5|STAT3|EGR3|CDKN1B|PIK3CB|NFKBIA|TBPL1|RB1|USP7|TRAF3|HIST1H2BB|PIK3CA|YWHAB|SRF|NFKB2|EP300|MDM2|RASA2	http://www.genome.jp/kegg-bin/show_pathway?bta05203/bta:526392%09red/bta:512613%09red/bta:286863%09red/bta:533491%09red/bta:534712%09red/bta:282291%09red/bta:112446776%09red/bta:519018%09red/bta:533136%09red/bta:506182%09red/bta:533039%09red/bta:514813%09red/bta:613818%09red/bta:526233%09red/bta:282306%09red/bta:507234%09red/bta:508541%09red/bta:517948%09red/bta:540378%09red/bta:524770%09red/bta:…
Homologous recombination	KEGG PATHWAY	bta03440	7	42	0.00463849	0.0810133	BRCA1|BRCA2|MUS81|BLM|POLD1|POLD2|TOP3B	http://www.genome.jp/kegg-bin/show_pathway?bta03440/bta:528432%09red/bta:534148%09red/bta:537418%09red/bta:507069%09red/bta:353120%09red/bta:281990%09red/bta:281991%09red
Acute myeloid leukemia	KEGG PATHWAY	bta05221	9	66	0.0046848	0.0810133	STAT3|PIM1|PIK3CA|PIK3CB|TCF7L1|TCF7L2|PPARD|RUNX1T1|PML	http://www.genome.jp/kegg-bin/show_pathway?bta05221/bta:540481%09red/bta:281402%09red/bta:515303%09red/bta:538628%09red/bta:282306%09red/bta:508541%09red/bta:517948%09red/bta:100138545%09red/bta:353106%09red
C-type lectin receptor signaling pathway	KEGG PATHWAY	bta04625	12	106	0.00475801	0.0810133	NFATC1|IL23A|PIK3CA|LSP1|NFKBIA|MDM2|CARD9|CYLD|EGR3|KSR1|NFKB2|PIK3CB	http://www.genome.jp/kegg-bin/show_pathway?bta04625/bta:511022%09red/bta:540378%09red/bta:100138565%09red/bta:282291%09red/bta:282306%09red/bta:526392%09red/bta:768054%09red/bta:508832%09red/bta:536421%09red/bta:517948%09red/bta:511224%09red/bta:526233%09red
PD-L1 expression and PD-1 checkpoint pathway in cancer	KEGG PATHWAY	bta05235	11	93	0.00500705	0.0810133	NFATC1|STAT3|CD274|PIK3CB|NFKBIA|MAP2K3|JAK2|IFNGR1|PIK3CA|TLR2|PDCD1	http://www.genome.jp/kegg-bin/show_pathway?bta05235/bta:525246%09red/bta:282291%09red/bta:508619%09red/bta:613842%09red/bta:516039%09red/bta:281534%09red/bta:533834%09red/bta:282306%09red/bta:508541%09red/bta:517948%09red/bta:511224%09red
Epstein-Barr virus infection	KEGG PATHWAY	bta05169	20	228	0.00525973	0.0810133	TLR2|TRAF3|SKP2|TRAF5|STAT3|CDKN1B|PIK3CB|NFKBIA|MAP3K7|RB1|USP7|MAP2K3|TAB1|IFNAR1|ICAM1|PIK3CA|SAP30|NFKB2|POLK|MDM2	http://www.genome.jp/kegg-bin/show_pathway?bta05169/bta:541218%09red/bta:512613%09red/bta:534712%09red/bta:282291%09red/bta:519958%09red/bta:519018%09red/bta:781150%09red/bta:540378%09red/bta:526392%09red/bta:516039%09red/bta:281534%09red/bta:514813%09red/bta:507234%09red/bta:282257%09red/bta:282306%09red/bta:529146%09red/bta:508541%09red/bta:517948%09red/bta:281839%09red/bta:506182%09red
Small cell lung cancer	KEGG PATHWAY	bta05222	11	94	0.00538201	0.0810133	TRAF3|SKP2|TRAF5|CDKN1B|PIK3CB|NFKBIA|ITGA6|RB1|PIK3CA|LAMC1|POLK	http://www.genome.jp/kegg-bin/show_pathway?bta05222/bta:532572%09red/bta:512613%09red/bta:541218%09red/bta:282291%09red/bta:519018%09red/bta:506182%09red/bta:534712%09red/bta:507234%09red/bta:535043%09red/bta:282306%09red/bta:517948%09red
Cell cycle	KEGG PATHWAY	bta04110	13	123	0.00571779	0.0817644	SKP2|CDC27|CDKN1B|ORC3|RB1|CDC14B|YWHAB|CDC45|MDM2|EP300|ANAPC5|ANAPC10|CDC7	http://www.genome.jp/kegg-bin/show_pathway?bta04110/bta:112446776%09red/bta:540660%09red/bta:534712%09red/bta:286863%09red/bta:540537%09red/bta:516094%09red/bta:520428%09red/bta:519018%09red/bta:523714%09red/bta:512613%09red/bta:540378%09red/bta:507122%09red/bta:783986%09red
AGE-RAGE signaling pathway in diabetic complications	KEGG PATHWAY	bta04933	11	103	0.00984198	0.125429	NFATC1|TGFBR1|F3|STAT3|PIM1|CDKN1B|PIK3CB|AGER|JAK2|ICAM1|PIK3CA	http://www.genome.jp/kegg-bin/show_pathway?bta04933/bta:517948%09red/bta:512613%09red/bta:281402%09red/bta:280686%09red/bta:281839%09red/bta:280986%09red/bta:282382%09red/bta:282306%09red/bta:508541%09red/bta:525246%09red/bta:511224%09red
Glycerophospholipid metabolism	KEGG PATHWAY	bta00564	11	103	0.00984198	0.125429	DGKZ|LPIN3|PLD3|MBOAT1|AGPAT5|SELENOI|GPD1|PGS1|GPD1L|LPGAT1|DGKE	http://www.genome.jp/kegg-bin/show_pathway?bta00564/bta:506381%09red/bta:541284%09red/bta:514456%09red/bta:525042%09red/bta:511887%09red/bta:613932%09red/bta:530414%09red/bta:538147%09red/bta:535126%09red/bta:541208%09red/bta:521637%09red
Human papillomavirus infection	KEGG PATHWAY	bta05165	26	345	0.0100869	0.125429	CDKN1B|EP300|PPP2R3A|ITGA6|ITGA7|IFNAR1|TSC2|FZD3|FZD5|PARD6G|FZD9|PIK3CB|UBE3A|RB1|TRAF3|MDM2|LAMC1|TBPL1|TCF7L1|TCF7L2|NOTCH3|TCIRG1|ATP6V0A1|PIK3CA|RHEB|PPP2R5B	http://www.genome.jp/kegg-bin/show_pathway?bta05165/bta:506182%09red/bta:538536%09red/bta:515303%09red/bta:282306%09red/bta:540378%09red/bta:539292%09red/bta:532572%09red/bta:517948%09red/bta:286768%09red/bta:535043%09red/bta:787607%09red/bta:533136%09red/bta:521364%09red/bta:540481%09red/bta:112446776%09red/bta:528204%09red/bta:282257%09red/bta:613818%09red/bta:512613%09red/bta:506953%09red/bta:…
Chronic myeloid leukemia	KEGG PATHWAY	bta05220	9	76	0.010531	0.125495	SHC4|TGFBR1|CDKN1B|PIK3CB|NFKBIA|RB1|PIK3CA|MDM2|POLK	http://www.genome.jp/kegg-bin/show_pathway?bta05220/bta:517948%09red/bta:524734%09red/bta:282291%09red/bta:541218%09red/bta:534712%09red/bta:282382%09red/bta:282306%09red/bta:512613%09red/bta:540378%09red
Phospholipase D signaling pathway	KEGG PATHWAY	bta04072	14	152	0.0123106	0.137812	DGKZ|SHC4|PTGFR|PIP5K1B|PIK3CB|AGPAT5|DNM1|PIK3CA|LPAR2|KITLG|RHEB|TSC2|PIP5K1A|DGKE	http://www.genome.jp/kegg-bin/show_pathway?bta04072/bta:100125224%09red/bta:537654%09red/bta:524734%09red/bta:509748%09red/bta:504985%09red/bta:528204%09red/bta:511887%09red/bta:530414%09red/bta:538147%09red/bta:281885%09red/bta:282306%09red/bta:517948%09red/bta:508794%09red/bta:282020%09red
AMPK signaling pathway	KEGG PATHWAY	bta04152	12	123	0.0133853	0.137812	ULK1|PIK3CA|PIK3CB|PPP2R3A|MAP3K7|CD36|PFKP|GYS1|HMGCR|RHEB|TSC2|PPP2R5B	http://www.genome.jp/kegg-bin/show_pathway?bta04152/bta:281052%09red/bta:526310%09red/bta:787607%09red/bta:528204%09red/bta:504985%09red/bta:529146%09red/bta:786335%09red/bta:407159%09red/bta:282306%09red/bta:517948%09red/bta:507119%09red/bta:505915%09red
Endocrine resistance	KEGG PATHWAY	bta01522	10	94	0.0137971	0.137812	SHC4|NCOA3|CDKN1B|PIK3CB|CARM1|RB1|NOTCH3|PIK3CA|JAG2|MDM2	http://www.genome.jp/kegg-bin/show_pathway?bta01522/bta:517948%09red/bta:534712%09red/bta:524734%09red/bta:789485%09red/bta:784795%09red/bta:282306%09red/bta:512613%09red/bta:540378%09red/bta:523707%09red/bta:517405%09red
Signaling pathways regulating pluripotency of stem cells	KEGG PATHWAY	bta04550	13	139	0.0139212	0.137812	ACVR2A|FZD3|STAT3|FZD5|RIF1|PIK3CA|PIK3CB|TBX3|BMPR1B|JAK2|INHBE|FZD9|ACVR1	http://www.genome.jp/kegg-bin/show_pathway?bta04550/bta:525246%09red/bta:541247%09red/bta:538536%09red/bta:517587%09red/bta:781063%09red/bta:407128%09red/bta:338068%09red/bta:282306%09red/bta:508541%09red/bta:517948%09red/bta:445419%09red/bta:521364%09red/bta:281598%09red
RNA polymerase	KEGG PATHWAY	bta03020	5	29	0.0141756	0.137812	POLR3G|POLR3A|POLR3B|POLR1E|POLR2J	http://www.genome.jp/kegg-bin/show_pathway?bta03020/bta:613778%09red/bta:540428%09red/bta:511587%09red/bta:540839%09red/bta:540308%09red
Cushing syndrome	KEGG PATHWAY	bta04934	14	156	0.0149108	0.137812	KMT2A|FZD3|FZD5|KMT2D|RB1|CDKN1B|FZD9|TCF7L1|TCF7L2|CACNA1G|WDR5B|GNA11|PDE8A|GNAQ	http://www.genome.jp/kegg-bin/show_pathway?bta04934/bta:512613%09red/bta:508330%09red/bta:538536%09red/bta:515303%09red/bta:100138335%09red/bta:506805%09red/bta:506787%09red/bta:534712%09red/bta:282411%09red/bta:521364%09red/bta:540481%09red/bta:445419%09red/bta:536654%09red/bta:281788%09red
Transcriptional misregulation in cancer	KEGG PATHWAY	bta05202	16	188	0.0149377	0.137812	WT1|KMT2A|BCL6|ETV6|CDKN1B|LMO2|NFKBIZ|BCL11B|DOT1L|MET|RUNX1T1|PML|MDM2|NSD2|POLK|FUT8	http://www.genome.jp/kegg-bin/show_pathway?bta05202/bta:280855%09red/bta:538628%09red/bta:508330%09red/bta:783269%09red/bta:282713%09red/bta:100138545%09red/bta:541218%09red/bta:539020%09red/bta:540769%09red/bta:782183%09red/bta:510442%09red/bta:281177%09red/bta:512613%09red/bta:540378%09red/bta:614876%09red/bta:504512%09red
PPAR signaling pathway	KEGG PATHWAY	bta03320	9	82	0.016004	0.141922	DBI|ACOX2|CD36|FABP7|PPARD|PLTP|SORBS1|SLC27A4|FADS2	http://www.genome.jp/kegg-bin/show_pathway?bta03320/bta:768330%09red/bta:281052%09red/bta:514969%09red/bta:505640%09red/bta:504625%09red/bta:514427%09red/bta:521822%09red/bta:777787%09red/bta:353106%09red
Hepatocellular carcinoma	KEGG PATHWAY	bta05225	15	174	0.0163756	0.141922	IGF2|SHC4|TGFBR1|FZD3|FZD5|ARID1B|PIK3CB|FZD9|TCF7L1|TCF7L2|MET|RB1|PIK3CA|POLK|GSTM1	http://www.genome.jp/kegg-bin/show_pathway?bta05225/bta:280855%09red/bta:540481%09red/bta:524734%09red/bta:538536%09red/bta:515303%09red/bta:783879%09red/bta:281240%09red/bta:541218%09red/bta:534712%09red/bta:505229%09red/bta:282306%09red/bta:282382%09red/bta:521364%09red/bta:517948%09red/bta:445419%09red
Adherens junction	KEGG PATHWAY	bta04520	8	69	0.017148	0.144245	ACTN1|MAP3K7|TCF7L2|TCF7L1|MET|SORBS1|EP300|TGFBR1	http://www.genome.jp/kegg-bin/show_pathway?bta04520/bta:280855%09red/bta:515303%09red/bta:112446776%09red/bta:504625%09red/bta:529146%09red/bta:282382%09red/bta:540481%09red/bta:524770%09red
Yersinia infection	KEGG PATHWAY	bta05135	12	131	0.0202287	0.164172	NFATC1|RPS6KA1|PIP5K1B|PIK3CB|NFKBIA|MAP3K7|ARHGEF1|MAP2K3|ARHGEF28|PIK3CA|PIP5K1A|TAB1	http://www.genome.jp/kegg-bin/show_pathway?bta05135/bta:100125224%09red/bta:537654%09red/bta:533908%09red/bta:282291%09red/bta:519958%09red/bta:516039%09red/bta:529146%09red/bta:616969%09red/bta:282306%09red/bta:517948%09red/bta:511224%09red/bta:513377%09red
Terpenoid backbone biosynthesis	KEGG PATHWAY	bta00900	4	21	0.0206731	0.164172	ZMPSTE24|RCE1|HMGCR|GGPS1	http://www.genome.jp/kegg-bin/show_pathway?bta00900/bta:539539%09red/bta:538104%09red/bta:780882%09red/bta:407159%09red
FoxO signaling pathway	KEGG PATHWAY	bta04068	12	132	0.021239	0.164172	TGFBR1|EP300|STAT3|CDKN1B|PIK3CB|USP7|FBXO32|PIK3CA|SKP2|HOMER3|BCL6|MDM2	http://www.genome.jp/kegg-bin/show_pathway?bta04068/bta:512613%09red/bta:112446776%09red/bta:519018%09red/bta:513776%09red/bta:514813%09red/bta:539020%09red/bta:282306%09red/bta:282382%09red/bta:508541%09red/bta:517948%09red/bta:540378%09red/bta:508124%09red
Osteoclast differentiation	KEGG PATHWAY	bta04380	12	133	0.0222862	0.167733	NFATC1|TGFBR1|OSCAR|PIK3CB|NFKBIA|MAP3K7|IFNAR1|CYLD|IFNGR1|PIK3CA|NFKB2|TAB1	http://www.genome.jp/kegg-bin/show_pathway?bta04380/bta:100336423%09red/bta:282257%09red/bta:282291%09red/bta:508619%09red/bta:526392%09red/bta:282306%09red/bta:529146%09red/bta:536421%09red/bta:282382%09red/bta:517948%09red/bta:511224%09red/bta:519958%09red
TNF signaling pathway	KEGG PATHWAY	bta04668	11	118	0.0229676	0.168429	TRAF3|TRAF5|PIK3CA|PIK3CB|NFKBIA|MAP3K7|IL18R1|MAP2K3|PGAM5|ICAM1|TAB1	http://www.genome.jp/kegg-bin/show_pathway?bta04668/bta:506182%09red/bta:508608%09red/bta:282291%09red/bta:519958%09red/bta:516039%09red/bta:507234%09red/bta:282306%09red/bta:529146%09red/bta:517948%09red/bta:281839%09red/bta:407221%09red
Proteoglycans in cancer	KEGG PATHWAY	bta05205	16	202	0.0260252	0.177886	IGF2|FZD3|STAT3|SLC9A1|PIK3CA|PIK3CB|FZD9|EZR|ARHGEF1|TLR2|MET|HOXD10|NUDT16L1|MDM2|PTCH1|FZD5	http://www.genome.jp/kegg-bin/show_pathway?bta05205/bta:281574%09red/bta:280855%09red/bta:540251%09red/bta:518085%09red/bta:538536%09red/bta:540378%09red/bta:281240%09red/bta:281534%09red/bta:317654%09red/bta:282306%09red/bta:508541%09red/bta:517948%09red/bta:445419%09red/bta:521364%09red/bta:520994%09red/bta:513377%09red
Gastric cancer	KEGG PATHWAY	bta05226	13	153	0.0267154	0.177886	SHC4|TGFBR1|FZD3|FZD5|CDKN1B|PIK3CB|FZD9|TCF7L1|TCF7L2|MET|RB1|PIK3CA|POLK	http://www.genome.jp/kegg-bin/show_pathway?bta05226/bta:280855%09red/bta:540481%09red/bta:524734%09red/bta:538536%09red/bta:515303%09red/bta:541218%09red/bta:534712%09red/bta:282382%09red/bta:282306%09red/bta:512613%09red/bta:517948%09red/bta:445419%09red/bta:521364%09red
Mismatch repair	KEGG PATHWAY	bta03430	4	23	0.0268179	0.177886	POLD1|POLD2|MLH3|RFC1	http://www.genome.jp/kegg-bin/show_pathway?bta03430/bta:514842%09red/bta:281990%09red/bta:281991%09red/bta:786279%09red
Insulin signaling pathway	KEGG PATHWAY	bta04910	12	137	0.0268587	0.177886	SHC4|GYS1|PPP1R3A|PIK3CA|PIK3CB|PRKAR2A|PYGB|FLOT2|SORBS1|RHEB|TSC2|PYGM	http://www.genome.jp/kegg-bin/show_pathway?bta04910/bta:327664%09red/bta:524734%09red/bta:784877%09red/bta:615679%09red/bta:100139910%09red/bta:528204%09red/bta:504985%09red/bta:504625%09red/bta:786335%09red/bta:282306%09red/bta:505560%09red/bta:517948%09red
Arrhythmogenic right ventricular cardiomyopathy (ARVC)	KEGG PATHWAY	bta05412	8	76	0.027438	0.177886	ACTN3|SGCA|ATP2A1|TCF7L1|ITGA6|ITGA7|TCF7L2|PKP2	http://www.genome.jp/kegg-bin/show_pathway?bta05412/bta:515303%09red/bta:535043%09red/bta:537784%09red/bta:539375%09red/bta:541308%09red/bta:518117%09red/bta:540481%09red/bta:506953%09red
Neurotrophin signaling pathway	KEGG PATHWAY	bta04722	11	122	0.027989	0.177886	SHC4|RPS6KA1|PIK3CA|PIK3CB|NFKBIA|ARHGDIA|MAPK7|MAP2K5|SH2B1|IRAK2|ZNF274	http://www.genome.jp/kegg-bin/show_pathway?bta04722/bta:533908%09red/bta:524734%09red/bta:282291%09red/bta:537703%09red/bta:534170%09red/bta:506066%09red/bta:100295732%09red/bta:282306%09red/bta:338054%09red/bta:517948%09red/bta:515034%09red
MAPK signaling pathway	KEGG PATHWAY	bta04010	21	292	0.0292875	0.182092	IGF2|NFATC1|TGFBR1|MAP4K2|SRF|RPS6KA1|RASA2|PPP5C|TAB1|EFNA4|MAP3K7|KITLG|MAP2K3|MET|FLT3LG|MAPK7|MAP2K5|NFKB2|CACNA1G|MAPKAPK5|PAK2	http://www.genome.jp/kegg-bin/show_pathway?bta04010/bta:280855%09red/bta:282411%09red/bta:520058%09red/bta:615879%09red/bta:533491%09red/bta:282382%09red/bta:519958%09red/bta:529146%09red/bta:281885%09red/bta:281240%09red/bta:533039%09red/bta:516039%09red/bta:526392%09red/bta:537703%09red/bta:513673%09red/bta:510245%09red/bta:100295732%09red/bta:535625%09red/bta:511224%09red/bta:282233%09red/bta:…
Prostate cancer	KEGG PATHWAY	bta05215	9	95	0.0345466	0.21022	CDKN1B|PIK3CB|NFKBIA|TCF7L1|TCF7L2|RB1|PIK3CA|MDM2|EP300	http://www.genome.jp/kegg-bin/show_pathway?bta05215/bta:540481%09red/bta:515303%09red/bta:282291%09red/bta:112446776%09red/bta:534712%09red/bta:282306%09red/bta:512613%09red/bta:517948%09red/bta:540378%09red
PI3K-Akt signaling pathway	KEGG PATHWAY	bta04151	25	373	0.0373387	0.222476	IGF2|GHR|CDKN1B|PPP2R3A|ITGA6|ITGA7|IFNAR1|TSC2|KITLG|PIK3CA|PIK3CB|JAK2|YWHAB|BRCA1|EFNA4|GNB3|GYS1|FLT3LG|MDM2|LAMC1|TLR2|MET|LPAR2|RHEB|PPP2R5B	http://www.genome.jp/kegg-bin/show_pathway?bta04151/bta:615879%09red/bta:509748%09red/bta:281240%09red/bta:280805%09red/bta:282306%09red/bta:540378%09red/bta:532572%09red/bta:517948%09red/bta:512613%09red/bta:286863%09red/bta:535043%09red/bta:787607%09red/bta:282233%09red/bta:528204%09red/bta:786335%09red/bta:525246%09red/bta:506953%09red/bta:280855%09red/bta:282257%09red/bta:513340%09red/bta:504…
Toxoplasmosis	KEGG PATHWAY	bta05145	10	113	0.0387783	0.226338	TLR2|STAT3|TAB1|NFKBIA|MAP3K7|ITGA6|MAP2K3|JAK2|IFNGR1|LAMC1	http://www.genome.jp/kegg-bin/show_pathway?bta05145/bta:532572%09red/bta:282291%09red/bta:508619%09red/bta:516039%09red/bta:529146%09red/bta:535043%09red/bta:281534%09red/bta:508541%09red/bta:525246%09red/bta:519958%09red
Phosphatidylinositol signaling system	KEGG PATHWAY	bta04070	9	99	0.0424041	0.241052	DGKZ|INPP5F|PIP5K1B|PIK3CB|PPIP5K1|SYNJ1|PIK3CA|PIP5K1A|DGKE	http://www.genome.jp/kegg-bin/show_pathway?bta04070/bta:100125224%09red/bta:537654%09red/bta:510684%09red/bta:282087%09red/bta:539889%09red/bta:511887%09red/bta:538147%09red/bta:282306%09red/bta:517948%09red
Human T-cell leukemia virus 1 infection	KEGG PATHWAY	bta05166	17	234	0.0429848	0.241052	XPO1|NFATC1|GPS2|SRF|CDC27|PIK3CA|PIK3CB|NFKBIA|ANAPC10|RB1|CRTC3|TGFBR1|ICAM1|TBPL1|NFKB2|EP300|ANAPC5	http://www.genome.jp/kegg-bin/show_pathway?bta05166/bta:526392%09red/bta:540660%09red/bta:534712%09red/bta:540537%09red/bta:282382%09red/bta:282291%09red/bta:112446776%09red/bta:510568%09red/bta:533039%09red/bta:518494%09red/bta:540109%09red/bta:282306%09red/bta:613818%09red/bta:517948%09red/bta:511224%09red/bta:783986%09red/bta:281839%09red
Inflammatory bowel disease (IBD)	KEGG PATHWAY	bta05321	7	69	0.0440841	0.242463	NFATC1|STAT3|IL23A|IL18R1|RORA|TLR2|IFNGR1	http://www.genome.jp/kegg-bin/show_pathway?bta05321/bta:508619%09red/bta:511022%09red/bta:281534%09red/bta:508541%09red/bta:535597%09red/bta:511224%09red/bta:407221%09red
Glycosphingolipid biosynthesis - ganglio series	KEGG PATHWAY	bta00604	3	16	0.0455423	0.245756	ST6GALNAC6|B4GALNT1|ST3GAL5	http://www.genome.jp/kegg-bin/show_pathway?bta00604/bta:404164%09red/bta:407222%09red/bta:520159%09red
Hippo signaling pathway	KEGG PATHWAY	bta04390	12	151	0.0482247	0.254955	TGFBR1|FZD3|FZD5|PARD6G|FZD9|SMAD7|LATS1|TCF7L2|TCF7L1|BMPR1B|YWHAB|WTIP	http://www.genome.jp/kegg-bin/show_pathway?bta04390/bta:505059%09red/bta:286863%09red/bta:535916%09red/bta:538536%09red/bta:515303%09red/bta:535935%09red/bta:407128%09red/bta:282382%09red/bta:521364%09red/bta:540481%09red/bta:445419%09red/bta:539292%09red
NF-kappa B signaling pathway	KEGG PATHWAY	bta04064	9	102	0.0490297	0.254955	TRAF3|TRAF5|TAB1|NFKBIA|MAP3K7|LTB|CYLD|ICAM1|NFKB2	http://www.genome.jp/kegg-bin/show_pathway?bta04064/bta:506182%09red/bta:529757%09red/bta:282291%09red/bta:519958%09red/bta:526392%09red/bta:507234%09red/bta:536421%09red/bta:529146%09red/bta:281839%09red
Glycosphingolipid biosynthesis - lacto and neolacto series	KEGG PATHWAY	bta00601	4	29	0.0511938	0.261454	B4GALT1|B3GNT5|FUT1|B3GALNT1	http://www.genome.jp/kegg-bin/show_pathway?bta00601/bta:767899%09red/bta:281174%09red/bta:281781%09red/bta:767844%09red
mTOR signaling pathway	KEGG PATHWAY	bta04150	12	154	0.0539924	0.270909	RPS6KA1|FZD3|SKP2|FZD5|RHEB|PIK3CA|PIK3CB|WDR59|ULK1|FZD9|RICTOR|TSC2	http://www.genome.jp/kegg-bin/show_pathway?bta04150/bta:526642%09red/bta:517948%09red/bta:533908%09red/bta:538536%09red/bta:526310%09red/bta:519018%09red/bta:528204%09red/bta:504985%09red/bta:282306%09red/bta:521364%09red/bta:527459%09red/bta:445419%09red
Inositol phosphate metabolism	KEGG PATHWAY	bta00562	7	73	0.0554786	0.273567	INPP5F|PIP5K1B|PIK3CB|SYNJ1|PIK3CA|MINPP1|PIP5K1A	http://www.genome.jp/kegg-bin/show_pathway?bta00562/bta:100125224%09red/bta:537654%09red/bta:282087%09red/bta:539889%09red/bta:541067%09red/bta:282306%09red/bta:517948%09red
Basal transcription factors	KEGG PATHWAY	bta03022	5	44	0.0577615	0.279268	TAF12|TBPL1|TAF4|ERCC2|TAF6L	http://www.genome.jp/kegg-bin/show_pathway?bta03022/bta:100125238%09red/bta:613818%09red/bta:531109%09red/bta:789854%09red/bta:614227%09red
Pancreatic cancer	KEGG PATHWAY	bta05212	7	74	0.0585878	0.279268	TGFBR1|BRCA2|STAT3|PIK3CA|PIK3CB|RB1|POLK	http://www.genome.jp/kegg-bin/show_pathway?bta05212/bta:541218%09red/bta:534712%09red/bta:507069%09red/bta:282382%09red/bta:282306%09red/bta:508541%09red/bta:517948%09red
IL-17 signaling pathway	KEGG PATHWAY	bta04657	8	91	0.0622529	0.291874	TRAF3|TRAF5|NFKBIA|MAP3K7|MAPK15|MAPK7|USP25|ANAPC5	http://www.genome.jp/kegg-bin/show_pathway?bta04657/bta:506182%09red/bta:540537%09red/bta:507234%09red/bta:282291%09red/bta:524531%09red/bta:537703%09red/bta:529146%09red/bta:512125%09red
Riboflavin metabolism	KEGG PATHWAY	bta00740	2	8	0.0656756	0.302955	FLAD1|ACP1	http://www.genome.jp/kegg-bin/show_pathway?bta00740/bta:506682%09red/bta:280977%09red
TGF-beta signaling pathway	KEGG PATHWAY	bta04350	8	93	0.0683408	0.310139	ACVR2A|TGFBR1|ACVR1|SMAD7|BMPR1B|INHBE|EP300|RGMA	http://www.genome.jp/kegg-bin/show_pathway?bta04350/bta:535916%09red/bta:112446776%09red/bta:518756%09red/bta:407128%09red/bta:282382%09red/bta:338068%09red/bta:517587%09red/bta:281598%09red
Toll-like receptor signaling pathway	KEGG PATHWAY	bta04620	9	110	0.0699098	0.310139	TLR2|TRAF3|PIK3CA|PIK3CB|NFKBIA|MAP3K7|MAP2K3|IFNAR1|TAB1	http://www.genome.jp/kegg-bin/show_pathway?bta04620/bta:506182%09red/bta:282291%09red/bta:519958%09red/bta:516039%09red/bta:282257%09red/bta:529146%09red/bta:282306%09red/bta:281534%09red/bta:517948%09red
Hedgehog signaling pathway	KEGG PATHWAY	bta04340	5	47	0.0710471	0.310139	CSNK1G3|BOC|GLI1|GLI3|PTCH1	http://www.genome.jp/kegg-bin/show_pathway?bta04340/bta:512018%09red/bta:517588%09red/bta:785371%09red/bta:407190%09red/bta:520994%09red
Fluid shear stress and atherosclerosis	KEGG PATHWAY	bta05418	11	145	0.072603	0.310139	ACVR2A|ACVR1|ICAM1|PIK3CA|PIK3CB|BMPR1B|MAP3K7|MEF2A|MAPK7|MAP2K5|GSTM1	http://www.genome.jp/kegg-bin/show_pathway?bta05418/bta:529146%09red/bta:783879%09red/bta:407231%09red/bta:407128%09red/bta:537703%09red/bta:338068%09red/bta:282306%09red/bta:100295732%09red/bta:517948%09red/bta:281839%09red/bta:281598%09red
Human immunodeficiency virus 1 infection	KEGG PATHWAY	bta05170	16	234	0.072655	0.310139	NFATC1|TLR2|TRAF5|PIK3CA|PIK3CB|NFKBIA|MAP3K7|GNB3|MAP2K3|GNA11|CGAS|RNF7|CUL5|TAB1|PAK2|GNAQ	http://www.genome.jp/kegg-bin/show_pathway?bta05170/bta:529146%09red/bta:513340%09red/bta:282291%09red/bta:519958%09red/bta:281534%09red/bta:513673%09red/bta:516039%09red/bta:515595%09red/bta:510331%09red/bta:782472%09red/bta:282306%09red/bta:507234%09red/bta:536654%09red/bta:517948%09red/bta:511224%09red/bta:281788%09red
DNA replication	KEGG PATHWAY	bta03030	4	36	0.0907987	0.372782	POLD1|POLD2|RFC1|RNASEH2B	http://www.genome.jp/kegg-bin/show_pathway?bta03030/bta:509258%09red/bta:514842%09red/bta:281990%09red/bta:281991%09red
Amoebiasis	KEGG PATHWAY	bta05146	8	100	0.0924283	0.372782	ACTN1|GNAQ|PIK3CA|PIK3CB|GNA11|TLR2|C8G|LAMC1	http://www.genome.jp/kegg-bin/show_pathway?bta05146/bta:532572%09red/bta:517356%09red/bta:281534%09red/bta:282306%09red/bta:536654%09red/bta:517948%09red/bta:524770%09red/bta:281788%09red
Choline metabolism in cancer	KEGG PATHWAY	bta05231	8	100	0.0924283	0.372782	DGKZ|PIP5K1B|PIK3CB|PIK3CA|RHEB|TSC2|PIP5K1A|DGKE	http://www.genome.jp/kegg-bin/show_pathway?bta05231/bta:100125224%09red/bta:537654%09red/bta:528204%09red/bta:511887%09red/bta:504985%09red/bta:538147%09red/bta:282306%09red/bta:517948%09red
Glycerolipid metabolism	KEGG PATHWAY	bta00561	6	67	0.0925437	0.372782	DGKZ|LPIN3|MBOAT1|PNPLA2|AGPAT5|DGKE	http://www.genome.jp/kegg-bin/show_pathway?bta00561/bta:511887%09red/bta:541284%09red/bta:530414%09red/bta:538147%09red/bta:508493%09red/bta:521637%09red
Purine metabolism	KEGG PATHWAY	bta00230	10	135	0.0941201	0.373866	AK9|NPR2|ADSS|AMPD3|AMPD2|NT5C3A|IMPDH1|RRM1|PDE8A|PFAS	http://www.genome.jp/kegg-bin/show_pathway?bta00230/bta:504305%09red/bta:506787%09red/bta:511858%09red/bta:281357%09red/bta:519803%09red/bta:522529%09red/bta:505537%09red/bta:514185%09red/bta:520318%09red/bta:504511%09red
Human cytomegalovirus infection	KEGG PATHWAY	bta05163	16	245	0.0969147	0.379693	NFATC1|STAT3|TRAF5|PIK3CA|PIK3CB|NFKBIA|RB1|ARHGEF1|AKAP13|GNB3|CGAS|GNA11|MDM2|RHEB|TSC2|GNAQ	http://www.genome.jp/kegg-bin/show_pathway?bta05163/bta:504288%09red/bta:534712%09red/bta:513340%09red/bta:282291%09red/bta:540378%09red/bta:281788%09red/bta:504985%09red/bta:507234%09red/bta:528204%09red/bta:282306%09red/bta:782472%09red/bta:508541%09red/bta:517948%09red/bta:511224%09red/bta:536654%09red/bta:513377%09red
Melanogenesis	KEGG PATHWAY	bta04916	8	102	0.100101	0.386879	FZD3|GNAQ|FZD9|TCF7L1|TCF7L2|KITLG|EP300|FZD5	http://www.genome.jp/kegg-bin/show_pathway?bta04916/bta:538536%09red/bta:515303%09red/bta:112446776%09red/bta:281885%09red/bta:521364%09red/bta:540481%09red/bta:445419%09red/bta:536654%09red
Synthesis and degradation of ketone bodies	KEGG PATHWAY	bta00072	2	11	0.104682	0.399188	HMGCL|BDH1	http://www.genome.jp/kegg-bin/show_pathway?bta00072/bta:317658%09red/bta:534090%09red
Progesterone-mediated oocyte maturation	KEGG PATHWAY	bta04914	7	88	0.11316	0.42584	RPS6KA1|CDC27|PIK3CA|PIK3CB|ANAPC10|CPEB2|ANAPC5	http://www.genome.jp/kegg-bin/show_pathway?bta04914/bta:540660%09red/bta:540537%09red/bta:282306%09red/bta:538880%09red/bta:517948%09red/bta:783986%09red/bta:533908%09red
Influenza A	KEGG PATHWAY	bta05164	12	178	0.116813	0.428108	XPO1|TRAF3|PIK3CA|PIK3CB|NFKBIA|IFNAR1|JAK2|IFNGR1|ICAM1|PML|EP300|RAE1	http://www.genome.jp/kegg-bin/show_pathway?bta05164/bta:112446776%09red/bta:525246%09red/bta:282291%09red/bta:508619%09red/bta:282257%09red/bta:510568%09red/bta:506182%09red/bta:282306%09red/bta:513080%09red/bta:517948%09red/bta:281839%09red/bta:100138545%09red
Colorectal cancer	KEGG PATHWAY	bta05210	7	89	0.117831	0.428108	TGFBR1|PIK3CA|PIK3CB|DCC|TCF7L2|TCF7L1|POLK	http://www.genome.jp/kegg-bin/show_pathway?bta05210/bta:540481%09red/bta:515303%09red/bta:541218%09red/bta:282382%09red/bta:537176%09red/bta:282306%09red/bta:517948%09red
Rap1 signaling pathway	KEGG PATHWAY	bta04015	14	216	0.119426	0.428108	SIPA1L1|EVL|GNAQ|PARD6G|PIK3CA|PIK3CB|EFNA4|MAP2K3|MET|SIPA1|LPAR2|SIPA1L3|KITLG|PRKD3	http://www.genome.jp/kegg-bin/show_pathway?bta04015/bta:280855%09red/bta:787248%09red/bta:615879%09red/bta:538447%09red/bta:508234%09red/bta:509748%09red/bta:516039%09red/bta:506201%09red/bta:281885%09red/bta:513625%09red/bta:282306%09red/bta:536654%09red/bta:517948%09red/bta:539292%09red
Wnt signaling pathway	KEGG PATHWAY	bta04310	11	161	0.121365	0.428108	NFATC1|FZD3|FZD5|DAAM1|MAP3K7|TCF7L2|TCF7L1|PPARD|FZD9|EP300|RYK	http://www.genome.jp/kegg-bin/show_pathway?bta04310/bta:538536%09red/bta:515303%09red/bta:511224%09red/bta:112446776%09red/bta:781353%09red/bta:513742%09red/bta:529146%09red/bta:521364%09red/bta:540481%09red/bta:445419%09red/bta:353106%09red
Tuberculosis	KEGG PATHWAY	bta05152	13	198	0.121547	0.428108	TLR2|RFXANK|IL23A|LSP1|CATHL5|TCIRG1|CARD9|JAK2|IFNGR1|IRAK2|KSR1|EP300|ATP6V0A1	http://www.genome.jp/kegg-bin/show_pathway?bta05152/bta:282167%09red/bta:286768%09red/bta:100138565%09red/bta:513684%09red/bta:508832%09red/bta:508619%09red/bta:100125917%09red/bta:511022%09red/bta:768054%09red/bta:281534%09red/bta:515034%09red/bta:525246%09red/bta:112446776%09red
Melanoma	KEGG PATHWAY	bta05218	6	73	0.122744	0.428108	PIK3CA|PIK3CB|RB1|MET|MDM2|POLK	http://www.genome.jp/kegg-bin/show_pathway?bta05218/bta:280855%09red/bta:534712%09red/bta:541218%09red/bta:282306%09red/bta:517948%09red/bta:540378%09red
NOD-like receptor signaling pathway	KEGG PATHWAY	bta04621	12	181	0.126787	0.436879	IFNAR1|CASP4|NFKBIA|TANK|TRAF5|TAB1|CATHL5|NAIP|MAP3K7|CARD9|TRAF3|P2RX7	http://www.genome.jp/kegg-bin/show_pathway?bta04621/bta:282167%09red/bta:338039%09red/bta:282291%09red/bta:519958%09red/bta:539513%09red/bta:768054%09red/bta:506182%09red/bta:529146%09red/bta:539780%09red/bta:286814%09red/bta:507234%09red/bta:282257%09red
Endometrial cancer	KEGG PATHWAY	bta05213	5	59	0.138928	0.469204	PIK3CA|PIK3CB|POLK|TCF7L1|TCF7L2	http://www.genome.jp/kegg-bin/show_pathway?bta05213/bta:515303%09red/bta:282306%09red/bta:517948%09red/bta:540481%09red/bta:541218%09red
Leishmaniasis	KEGG PATHWAY	bta05140	6	76	0.139449	0.469204	TAB1|NFKBIA|MAP3K7|TLR2|JAK2|IFNGR1	http://www.genome.jp/kegg-bin/show_pathway?bta05140/bta:282291%09red/bta:508619%09red/bta:529146%09red/bta:281534%09red/bta:525246%09red/bta:519958%09red
Glioma	KEGG PATHWAY	bta05214	6	77	0.14524	0.473444	SHC4|PIK3CA|PIK3CB|RB1|MDM2|POLK	http://www.genome.jp/kegg-bin/show_pathway?bta05214/bta:534712%09red/bta:524734%09red/bta:541218%09red/bta:282306%09red/bta:517948%09red/bta:540378%09red
Glycosaminoglycan biosynthesis - keratan sulfate	KEGG PATHWAY	bta00533	2	14	0.148247	0.473444	B4GALT1|FUT8	http://www.genome.jp/kegg-bin/show_pathway?bta00533/bta:281781%09red/bta:281177%09red
Kaposi sarcoma-associated herpesvirus infection	KEGG PATHWAY	bta05167	13	206	0.148265	0.473444	NFATC1|TRAF3|STAT3|PIK3CA|PIK3CB|NFKBIA|RB1|IFNAR1|JAK2|IFNGR1|ICAM1|EP300|GNB3	http://www.genome.jp/kegg-bin/show_pathway?bta05167/bta:525246%09red/bta:513340%09red/bta:282291%09red/bta:508619%09red/bta:282257%09red/bta:506182%09red/bta:534712%09red/bta:282306%09red/bta:508541%09red/bta:517948%09red/bta:511224%09red/bta:112446776%09red/bta:281839%09red
Th17 cell differentiation	KEGG PATHWAY	bta04659	8	113	0.148344	0.473444	NFATC1|TGFBR1|STAT3|IL23A|NFKBIA|RORA|JAK2|IFNGR1	http://www.genome.jp/kegg-bin/show_pathway?bta04659/bta:535597%09red/bta:282291%09red/bta:508619%09red/bta:511022%09red/bta:282382%09red/bta:508541%09red/bta:525246%09red/bta:511224%09red
Synaptic vesicle cycle	KEGG PATHWAY	bta04721	6	78	0.15114	0.473444	SLC6A9|TCIRG1|UNC13B|ATP6V0A1|DNM1|SLC1A1	http://www.genome.jp/kegg-bin/show_pathway?bta04721/bta:282353%09red/bta:286768%09red/bta:513684%09red/bta:508794%09red/bta:282368%09red/bta:530692%09red
Platinum drug resistance	KEGG PATHWAY	bta01524	6	78	0.15114	0.473444	BRCA1|PIK3CA|PIK3CB|REV3L|GSTM1|MDM2	http://www.genome.jp/kegg-bin/show_pathway?bta01524/bta:783879%09red/bta:353120%09red/bta:282306%09red/bta:517948%09red/bta:540378%09red/bta:517422%09red
Endocytosis	KEGG PATHWAY	bta04144	15	246	0.153796	0.473444	RAB11FIP3|TGFBR1|SPG21|PARD6G|PIP5K1B|PIP5K1A|GRK5|SH3GLB2|ACAP3|IQSEC1|DNM1|PSD|PML|MDM2|ASAP1	http://www.genome.jp/kegg-bin/show_pathway?bta04144/bta:404069%09red/bta:100125224%09red/bta:537654%09red/bta:282382%09red/bta:281801%09red/bta:508794%09red/bta:523124%09red/bta:100138545%09red/bta:515444%09red/bta:327705%09red/bta:511647%09red/bta:521541%09red/bta:540378%09red/bta:539292%09red/bta:504750%09red
Hippo signaling pathway - multiple species	KEGG PATHWAY	bta04392	3	29	0.15606	0.473444	DCHS1|WTIP|LATS1	http://www.genome.jp/kegg-bin/show_pathway?bta04392/bta:535935%09red/bta:515576%09red/bta:505059%09red
RNA degradation	KEGG PATHWAY	bta03018	6	79	0.157144	0.473444	PARN|LSM1|PFKP|EDC3|DDX6|CNOT3	http://www.genome.jp/kegg-bin/show_pathway?bta03018/bta:513906%09red/bta:527305%09red/bta:517979%09red/bta:524155%09red/bta:535447%09red/bta:507119%09red
Nucleotide excision repair	KEGG PATHWAY	bta03420	4	45	0.157263	0.473444	POLD1|POLD2|RFC1|ERCC2	http://www.genome.jp/kegg-bin/show_pathway?bta03420/bta:100125238%09red/bta:514842%09red/bta:281990%09red/bta:281991%09red
Chagas disease (American trypanosomiasis)	KEGG PATHWAY	bta05142	8	116	0.163173	0.481339	TGFBR1|GNAQ|PIK3CA|PIK3CB|NFKBIA|TLR2|IFNGR1|GNA11	http://www.genome.jp/kegg-bin/show_pathway?bta05142/bta:282291%09red/bta:508619%09red/bta:282382%09red/bta:282306%09red/bta:281534%09red/bta:536654%09red/bta:517948%09red/bta:281788%09red
EGFR tyrosine kinase inhibitor resistance	KEGG PATHWAY	bta01521	6	80	0.163251	0.481339	SHC4|STAT3|PIK3CA|PIK3CB|MET|JAK2	http://www.genome.jp/kegg-bin/show_pathway?bta01521/bta:280855%09red/bta:525246%09red/bta:524734%09red/bta:282306%09red/bta:508541%09red/bta:517948%09red
Regulation of actin cytoskeleton	KEGG PATHWAY	bta04810	13	212	0.170188	0.496672	ACTN1|ARHGEF4|SLC9A1|PIP5K1B|PIK3CB|ITGA6|ARHGEF1|EZR|PIK3CA|LPAR2|ITGA7|PIP5K1A|PAK2	http://www.genome.jp/kegg-bin/show_pathway?bta04810/bta:281574%09red/bta:505852%09red/bta:100125224%09red/bta:537654%09red/bta:535043%09red/bta:509748%09red/bta:513673%09red/bta:317654%09red/bta:282306%09red/bta:517948%09red/bta:506953%09red/bta:524770%09red/bta:513377%09red
Galactose metabolism	KEGG PATHWAY	bta00052	3	31	0.177232	0.506836	B4GALT1|GALK1|PFKP	http://www.genome.jp/kegg-bin/show_pathway?bta00052/bta:530855%09red/bta:507119%09red/bta:281781%09red
Oocyte meiosis	KEGG PATHWAY	bta04114	8	119	0.178657	0.506836	RPS6KA1|FBXO43|CDC27|ANAPC10|CPEB2|YWHAB|ANAPC5|PPP2R5B	http://www.genome.jp/kegg-bin/show_pathway?bta04114/bta:540660%09red/bta:286863%09red/bta:533908%09red/bta:540145%09red/bta:505915%09red/bta:538880%09red/bta:783986%09red/bta:540537%09red
Arginine and proline metabolism	KEGG PATHWAY	bta00330	4	48	0.182556	0.506836	CKM|ALDH4A1|SMOX|CARNS1	http://www.genome.jp/kegg-bin/show_pathway?bta00330/bta:100126042%09red/bta:286822%09red/bta:527211%09red/bta:783525%09red
Necroptosis	KEGG PATHWAY	bta04217	11	177	0.18456	0.506836	IFNAR1|STAT3|TRAF5|PYGM|PYGB|PGAM5|JAK2|IFNGR1|SPATA2|CYLD|HIST2H2AC	http://www.genome.jp/kegg-bin/show_pathway?bta04217/bta:327664%09red/bta:508608%09red/bta:513666%09red/bta:529745%09red/bta:508619%09red/bta:282257%09red/bta:507234%09red/bta:536421%09red/bta:508541%09red/bta:525246%09red/bta:505560%09red
Nicotinate and nicotinamide metabolism	KEGG PATHWAY	bta00760	3	32	0.188099	0.506836	NUDT12|NADK2|NT5C3A	http://www.genome.jp/kegg-bin/show_pathway?bta00760/bta:511858%09red/bta:617720%09red/bta:506968%09red
Starch and sucrose metabolism	KEGG PATHWAY	bta00500	3	32	0.188099	0.506836	GYS1|PYGB|PYGM	http://www.genome.jp/kegg-bin/show_pathway?bta00500/bta:505560%09red/bta:327664%09red/bta:786335%09red
Peroxisome	KEGG PATHWAY	bta04146	6	84	0.188647	0.506836	ACOX2|PRDX1|NUDT12|HMGCL|SLC25A17|PEX16	http://www.genome.jp/kegg-bin/show_pathway?bta04146/bta:617720%09red/bta:514969%09red/bta:506631%09red/bta:317658%09red/bta:510447%09red/bta:281997%09red
Apelin signaling pathway	KEGG PATHWAY	bta04371	9	140	0.190135	0.506836	TGFBR1|SLC9A1|RYR3|GNB3|NOTCH3|MEF2A|MYL3|MEF2D|GNAQ	http://www.genome.jp/kegg-bin/show_pathway?bta04371/bta:618352%09red/bta:513340%09red/bta:539899%09red/bta:789485%09red/bta:100336730%09red/bta:407231%09red/bta:282382%09red/bta:317654%09red/bta:536654%09red
Sphingolipid metabolism	KEGG PATHWAY	bta00600	4	49	0.19127	0.506836	SMPD4|ARSA|SGMS1|GALC	http://www.genome.jp/kegg-bin/show_pathway?bta00600/bta:507207%09red/bta:505514%09red/bta:533538%09red/bta:533428%09red
Glycosphingolipid biosynthesis - globo and isoglobo series	KEGG PATHWAY	bta00603	2	17	0.194659	0.506836	FUT1|B3GALNT1	http://www.genome.jp/kegg-bin/show_pathway?bta00603/bta:281174%09red/bta:767844%09red
Non-small cell lung cancer	KEGG PATHWAY	bta05223	5	67	0.195415	0.506836	PIK3CA|PIK3CB|STAT3|POLK|RB1	http://www.genome.jp/kegg-bin/show_pathway?bta05223/bta:282306%09red/bta:541218%09red/bta:508541%09red/bta:517948%09red/bta:534712%09red
Cytosolic DNA-sensing pathway	KEGG PATHWAY	bta04623	5	67	0.195415	0.506836	POLR3G|NFKBIA|POLR3B|CGAS|POLR3A	http://www.genome.jp/kegg-bin/show_pathway?bta04623/bta:282291%09red/bta:613778%09red/bta:540308%09red/bta:540839%09red/bta:782472%09red
Parathyroid hormone synthesis, secretion and action	KEGG PATHWAY	bta04928	7	104	0.198834	0.506836	MMP15|GNAQ|MEF2D|ARHGEF1|MEF2A|AKAP13|GNA11	http://www.genome.jp/kegg-bin/show_pathway?bta04928/bta:100336730%09red/bta:282887%09red/bta:407231%09red/bta:536654%09red/bta:281788%09red/bta:504288%09red/bta:513377%09red
Base excision repair	KEGG PATHWAY	bta03410	3	33	0.199132	0.506836	XRCC1|POLD1|POLD2	http://www.genome.jp/kegg-bin/show_pathway?bta03410/bta:281990%09red/bta:281991%09red/bta:616905%09red
Lysosome	KEGG PATHWAY	bta04142	8	123	0.200253	0.506836	ARSA|AP4S1|GALNS|CD164|CTSF|TCIRG1|ATP6V0A1|GALC	http://www.genome.jp/kegg-bin/show_pathway?bta04142/bta:515809%09red/bta:286768%09red/bta:618267%09red/bta:513684%09red/bta:505514%09red/bta:533428%09red/bta:509820%09red/bta:509715%09red
N-Glycan biosynthesis	KEGG PATHWAY	bta00510	4	51	0.209071	0.519036	B4GALT1|ALG10|DOLPP1|FUT8	http://www.genome.jp/kegg-bin/show_pathway?bta00510/bta:281177%09red/bta:539837%09red/bta:281781%09red/bta:504908%09red
Amyotrophic lateral sclerosis (ALS)	KEGG PATHWAY	bta05014	4	51	0.209071	0.519036	MAP2K3|CCS|NEFH|GRIN2D	http://www.genome.jp/kegg-bin/show_pathway?bta05014/bta:516039%09red/bta:618181%09red/bta:515022%09red/bta:528842%09red
2-Oxocarboxylic acid metabolism	KEGG PATHWAY	bta01210	2	18	0.210518	0.519036	GPT|ACY1	http://www.genome.jp/kegg-bin/show_pathway?bta01210/bta:539188%09red/bta:768058%09red
Cytokine-cytokine receptor interaction	KEGG PATHWAY	bta04060	18	323	0.213557	0.522028	TGFBR1|ACVR2A|GDF9|ACVR1|GHR|IL23A|ACKR4|TNFSF18|TNFRSF21|IL18R1|LTB|BMPR1B|IFNAR1|IFNGR1|IL27|TNFRSF4|TNFRSF12A|INHBE	http://www.genome.jp/kegg-bin/show_pathway?bta04060/bta:768081%09red/bta:529757%09red/bta:537922%09red/bta:508619%09red/bta:282257%09red/bta:280805%09red/bta:282574%09red/bta:511022%09red/bta:281672%09red/bta:617439%09red/bta:407128%09red/bta:282382%09red/bta:338068%09red/bta:407221%09red/bta:614927%09red/bta:517587%09red/bta:528782%09red/bta:281598%09red
T cell receptor signaling pathway	KEGG PATHWAY	bta04660	7	107	0.217181	0.526389	NFATC1|PIK3CA|PIK3CB|NFKBIA|MAP3K7|PAK2|PDCD1	http://www.genome.jp/kegg-bin/show_pathway?bta04660/bta:282291%09red/bta:613842%09red/bta:513673%09red/bta:529146%09red/bta:282306%09red/bta:517948%09red/bta:511224%09red
Cellular senescence	KEGG PATHWAY	bta04218	10	166	0.223938	0.535358	NFATC1|TGFBR1|PIK3CA|PIK3CB|ZFP36L1|RB1|MAP2K3|MDM2|RHEB|TSC2	http://www.genome.jp/kegg-bin/show_pathway?bta04218/bta:534712%09red/bta:540378%09red/bta:614773%09red/bta:528204%09red/bta:516039%09red/bta:504985%09red/bta:282382%09red/bta:282306%09red/bta:517948%09red/bta:511224%09red
Renal cell carcinoma	KEGG PATHWAY	bta05211	5	71	0.226228	0.535358	MET|PIK3CB|EP300|PAK2|PIK3CA	http://www.genome.jp/kegg-bin/show_pathway?bta05211/bta:282306%09red/bta:280855%09red/bta:112446776%09red/bta:517948%09red/bta:513673%09red
Arginine biosynthesis	KEGG PATHWAY	bta00220	2	19	0.226498	0.535358	GPT|ACY1	http://www.genome.jp/kegg-bin/show_pathway?bta00220/bta:539188%09red/bta:768058%09red
Longevity regulating pathway	KEGG PATHWAY	bta04211	6	90	0.229311	0.537565	ULK1|PIK3CA|PIK3CB|EHMT2|RHEB|TSC2	http://www.genome.jp/kegg-bin/show_pathway?bta04211/bta:514062%09red/bta:526310%09red/bta:528204%09red/bta:504985%09red/bta:282306%09red/bta:517948%09red
cAMP signaling pathway	KEGG PATHWAY	bta04024	13	228	0.235735	0.544571	NFATC1|EP300|SLC9A1|SST|PIK3CB|NFKBIA|GLI3|SOX9|GRIN2D|PIK3CA|PTCH1|GLI1|ATP2A1	http://www.genome.jp/kegg-bin/show_pathway?bta04024/bta:100336535%09red/bta:282291%09red/bta:112446776%09red/bta:618181%09red/bta:517588%09red/bta:785371%09red/bta:317654%09red/bta:518117%09red/bta:282306%09red/bta:517948%09red/bta:511224%09red/bta:520994%09red/bta:280932%09red
HIF-1 signaling pathway	KEGG PATHWAY	bta04066	7	110	0.236108	0.544571	STAT3|CDKN1B|PIK3CB|PFKP|IFNGR1|PIK3CA|EP300	http://www.genome.jp/kegg-bin/show_pathway?bta04066/bta:512613%09red/bta:508619%09red/bta:282306%09red/bta:508541%09red/bta:517948%09red/bta:507119%09red/bta:112446776%09red
Aldosterone-regulated sodium reabsorption	KEGG PATHWAY	bta04960	3	37	0.244597	0.552071	NR3C2|PIK3CB|PIK3CA	http://www.genome.jp/kegg-bin/show_pathway?bta04960/bta:282306%09red/bta:537614%09red/bta:517948%09red
Alanine, aspartate and glutamate metabolism	KEGG PATHWAY	bta00250	3	37	0.244597	0.552071	GPT|ALDH4A1|ADSS	http://www.genome.jp/kegg-bin/show_pathway?bta00250/bta:522529%09red/bta:100126042%09red/bta:539188%09red
Bacterial invasion of epithelial cells	KEGG PATHWAY	bta05100	5	74	0.250211	0.552071	SHC4|MET|PIK3CB|DNM1|PIK3CA	http://www.genome.jp/kegg-bin/show_pathway?bta05100/bta:282306%09red/bta:280855%09red/bta:508794%09red/bta:517948%09red/bta:524734%09red
Gastric acid secretion	KEGG PATHWAY	bta04971	5	74	0.250211	0.552071	SST|HRH2|SLC9A1|EZR|GNAQ	http://www.genome.jp/kegg-bin/show_pathway?bta04971/bta:281574%09red/bta:521257%09red/bta:536654%09red/bta:317654%09red/bta:280932%09red
Measles	KEGG PATHWAY	bta05162	9	152	0.254084	0.552071	TRAF3|STAT3|CDKN1B|PIK3CB|NFKBIA|MAP3K7|TLR2|IFNAR1|PIK3CA	http://www.genome.jp/kegg-bin/show_pathway?bta05162/bta:512613%09red/bta:282291%09red/bta:282257%09red/bta:506182%09red/bta:529146%09red/bta:282306%09red/bta:281534%09red/bta:508541%09red/bta:517948%09red
Pyrimidine metabolism	KEGG PATHWAY	bta00240	4	56	0.255385	0.552071	AK9|NT5C3A|RRM1|TK1	http://www.genome.jp/kegg-bin/show_pathway?bta00240/bta:504652%09red/bta:505537%09red/bta:504511%09red/bta:511858%09red
Legionellosis	KEGG PATHWAY	bta05134	4	56	0.255385	0.552071	TLR2|NFKB2|NFKBIA|NAIP	http://www.genome.jp/kegg-bin/show_pathway?bta05134/bta:526392%09red/bta:282291%09red/bta:281534%09red/bta:539780%09red
Leukocyte transendothelial migration	KEGG PATHWAY	bta04670	7	113	0.255548	0.552071	ACTN1|JAM2|PIK3CA|PIK3CB|EZR|ICAM1|SIPA1	http://www.genome.jp/kegg-bin/show_pathway?bta04670/bta:281574%09red/bta:517948%09red/bta:508234%09red/bta:282306%09red/bta:538846%09red/bta:281839%09red/bta:524770%09red
Fc gamma R-mediated phagocytosis	KEGG PATHWAY	bta04666	6	94	0.257831	0.552071	PIP5K1B|PIK3CB|ASAP1|PIK3CA|PIP5K1A|MYO10	http://www.genome.jp/kegg-bin/show_pathway?bta04666/bta:281935%09red/bta:100125224%09red/bta:537654%09red/bta:327705%09red/bta:282306%09red/bta:517948%09red
Other types of O-glycan biosynthesis	KEGG PATHWAY	bta00514	2	21	0.258663	0.552071	B4GALT1|POGLUT1	http://www.genome.jp/kegg-bin/show_pathway?bta00514/bta:511862%09red/bta:281781%09red
Cholinergic synapse	KEGG PATHWAY	bta04725	7	114	0.262131	0.555187	GNAQ|PIK3CA|PIK3CB|GNB3|JAK2|GNA11|KCNQ4	http://www.genome.jp/kegg-bin/show_pathway?bta04725/bta:525246%09red/bta:513340%09red/bta:528741%09red/bta:282306%09red/bta:536654%09red/bta:517948%09red/bta:281788%09red
Phosphonate and phosphinate metabolism	KEGG PATHWAY	bta00440	1	6	0.264005	0.555187	SELENOI	http://www.genome.jp/kegg-bin/show_pathway?bta00440/bta:506381%09red
Drug metabolism - other enzymes	KEGG PATHWAY	bta00983	5	76	0.266541	0.556429	GSTM1|NAT1|IMPDH1|RRM1|TK1	http://www.genome.jp/kegg-bin/show_pathway?bta00983/bta:504305%09red/bta:504652%09red/bta:505537%09red/bta:512603%09red/bta:783879%09red
Regulation of lipolysis in adipocytes	KEGG PATHWAY	bta04923	4	58	0.274467	0.568823	PNPLA2|PIK3CB|PRKG1|PIK3CA	http://www.genome.jp/kegg-bin/show_pathway?bta04923/bta:282306%09red/bta:282004%09red/bta:517948%09red/bta:508493%09red
Thyroid cancer	KEGG PATHWAY	bta05216	3	40	0.279669	0.575435	POLK|TCF7L1|TCF7L2	http://www.genome.jp/kegg-bin/show_pathway?bta05216/bta:515303%09red/bta:541218%09red/bta:540481%09red
Malaria	KEGG PATHWAY	bta05144	4	59	0.284096	0.580367	TLR2|MET|CD36|ICAM1	http://www.genome.jp/kegg-bin/show_pathway?bta05144/bta:280855%09red/bta:281534%09red/bta:281839%09red/bta:281052%09red
Th1 and Th2 cell differentiation	KEGG PATHWAY	bta04658	6	98	0.287229	0.582606	NFATC1|NFKBIA|NOTCH3|JAK2|IFNGR1|JAG2	http://www.genome.jp/kegg-bin/show_pathway?bta04658/bta:282291%09red/bta:508619%09red/bta:525246%09red/bta:511224%09red/bta:789485%09red/bta:517405%09red
Glutathione metabolism	KEGG PATHWAY	bta00480	4	60	0.293774	0.591685	GSTM1|GGT1|ANPEP|RRM1	http://www.genome.jp/kegg-bin/show_pathway?bta00480/bta:783879%09red/bta:615582%09red/bta:505537%09red/bta:404191%09red
Ras signaling pathway	KEGG PATHWAY	bta04014	13	242	0.299939	0.599878	IGF2|SHC4|PIK3CA|PIK3CB|EFNA4|RIN1|GNB3|MET|FLT3LG|RASA2|KSR1|KITLG|PAK2	http://www.genome.jp/kegg-bin/show_pathway?bta04014/bta:280855%09red/bta:615879%09red/bta:533491%09red/bta:100138565%09red/bta:513673%09red/bta:524734%09red/bta:281240%09red/bta:509295%09red/bta:282306%09red/bta:517948%09red/bta:513340%09red/bta:282233%09red/bta:281885%09red
Circadian entrainment	KEGG PATHWAY	bta04713	6	100	0.302189	0.60018	GNAQ|RYR3|GNB3|CACNA1G|PRKG1|GRIN2D	http://www.genome.jp/kegg-bin/show_pathway?bta04713/bta:282004%09red/bta:282411%09red/bta:513340%09red/bta:539899%09red/bta:618181%09red/bta:536654%09red
Jak-STAT signaling pathway	KEGG PATHWAY	bta04630	11	202	0.306207	0.603967	STAT3|GHR|IL23A|PIM1|PIK3CA|PIK3CB|IFNAR1|JAK2|IFNGR1|PTPN2|EP300	http://www.genome.jp/kegg-bin/show_pathway?bta04630/bta:525246%09red/bta:281402%09red/bta:508619%09red/bta:540888%09red/bta:511022%09red/bta:280805%09red/bta:282257%09red/bta:282306%09red/bta:508541%09red/bta:517948%09red/bta:112446776%09red
Rheumatoid arthritis	KEGG PATHWAY	bta05323	6	102	0.317286	0.621533	TLR2|IL23A|TCIRG1|LTB|ATP6V0A1|ICAM1	http://www.genome.jp/kegg-bin/show_pathway?bta05323/bta:286768%09red/bta:513684%09red/bta:511022%09red/bta:281534%09red/bta:529757%09red/bta:281839%09red
Prolactin signaling pathway	KEGG PATHWAY	bta04917	5	83	0.325234	0.628492	SHC4|JAK2|PIK3CB|STAT3|PIK3CA	http://www.genome.jp/kegg-bin/show_pathway?bta04917/bta:282306%09red/bta:508541%09red/bta:517948%09red/bta:524734%09red/bta:525246%09red
Ribosome biogenesis in eukaryotes	KEGG PATHWAY	bta03008	5	83	0.325234	0.628492	XPO1|UTP18|RPP40|NOP58|TBL3	http://www.genome.jp/kegg-bin/show_pathway?bta03008/bta:618429%09red/bta:510568%09red/bta:507155%09red/bta:531274%09red/bta:505846%09red
Glucagon signaling pathway	KEGG PATHWAY	bta04922	6	104	0.332495	0.636359	GNAQ|PFKP|GYS1|PYGB|EP300|PYGM	http://www.genome.jp/kegg-bin/show_pathway?bta04922/bta:112446776%09red/bta:786335%09red/bta:505560%09red/bta:327664%09red/bta:507119%09red/bta:536654%09red
MicroRNAs in cancer	KEGG PATHWAY	bta05206	14	270	0.333755	0.636359	BRCA1|HOXD10|FZD3|STAT3|PIM1|SHC4|CDKN1B|EZR|NOTCH3|MET|DNMT3A|MAPK7|MDM2|EP300	http://www.genome.jp/kegg-bin/show_pathway?bta05206/bta:281574%09red/bta:280855%09red/bta:540251%09red/bta:281402%09red/bta:359716%09red/bta:789485%09red/bta:540378%09red/bta:524734%09red/bta:353120%09red/bta:537703%09red/bta:508541%09red/bta:512613%09red/bta:445419%09red/bta:112446776%09red
ErbB signaling pathway	KEGG PATHWAY	bta04012	5	85	0.342285	0.640494	SHC4|CDKN1B|PIK3CB|PAK2|PIK3CA	http://www.genome.jp/kegg-bin/show_pathway?bta04012/bta:282306%09red/bta:512613%09red/bta:517948%09red/bta:524734%09red/bta:513673%09red
Central carbon metabolism in cancer	KEGG PATHWAY	bta05230	4	65	0.342642	0.640494	MET|PIK3CB|PIK3CA|PFKP	http://www.genome.jp/kegg-bin/show_pathway?bta05230/bta:282306%09red/bta:280855%09red/bta:517948%09red/bta:507119%09red
Cortisol synthesis and secretion	KEGG PATHWAY	bta04927	4	65	0.342642	0.640494	CACNA1G|GNAQ|PDE8A|GNA11	http://www.genome.jp/kegg-bin/show_pathway?bta04927/bta:506787%09red/bta:536654%09red/bta:282411%09red/bta:281788%09red
Type II diabetes mellitus	KEGG PATHWAY	bta04930	3	46	0.35072	0.649035	PIK3CA|PIK3CB|CACNA1G	http://www.genome.jp/kegg-bin/show_pathway?bta04930/bta:282306%09red/bta:282411%09red/bta:517948%09red
Aminoacyl-tRNA biosynthesis	KEGG PATHWAY	bta00970	4	66	0.352463	0.649035	CARS2|VARS2|QRSL1|NARS2	http://www.genome.jp/kegg-bin/show_pathway?bta00970/bta:532822%09red/bta:504824%09red/bta:100847824%09red/bta:506598%09red
cGMP-PKG signaling pathway	KEGG PATHWAY	bta04022	9	169	0.354019	0.649035	NFATC1|NPR2|SRF|ATP2A1|MEF2D|MEF2A|PRKG1|GNA11|GNAQ	http://www.genome.jp/kegg-bin/show_pathway?bta04022/bta:282004%09red/bta:281357%09red/bta:100336730%09red/bta:533039%09red/bta:407231%09red/bta:518117%09red/bta:536654%09red/bta:511224%09red/bta:281788%09red
Butanoate metabolism	KEGG PATHWAY	bta00650	2	28	0.370177	0.661097	HMGCL|BDH1	http://www.genome.jp/kegg-bin/show_pathway?bta00650/bta:317658%09red/bta:534090%09red
Collecting duct acid secretion	KEGG PATHWAY	bta04966	2	28	0.370177	0.661097	TCIRG1|ATP6V0A1	http://www.genome.jp/kegg-bin/show_pathway?bta04966/bta:513684%09red/bta:286768%09red
Notch signaling pathway	KEGG PATHWAY	bta04330	3	48	0.374325	0.661097	JAG2|EP300|NOTCH3	http://www.genome.jp/kegg-bin/show_pathway?bta04330/bta:789485%09red/bta:112446776%09red/bta:517405%09red
Hematopoietic cell lineage	KEGG PATHWAY	bta04640	6	110	0.378527	0.661097	ITGA6|CD55|CD36|FLT3LG|ANPEP|KITLG	http://www.genome.jp/kegg-bin/show_pathway?bta04640/bta:404191%09red/bta:535043%09red/bta:518609%09red/bta:281885%09red/bta:281052%09red/bta:282233%09red
Natural killer cell mediated cytotoxicity	KEGG PATHWAY	bta04650	7	131	0.379189	0.661097	SHC4|NFATC1|PIK3CA|PIK3CB|IFNAR1|IFNGR1|ICAM1	http://www.genome.jp/kegg-bin/show_pathway?bta04650/bta:282257%09red/bta:524734%09red/bta:511224%09red/bta:508619%09red/bta:282306%09red/bta:517948%09red/bta:281839%09red
Long-term potentiation	KEGG PATHWAY	bta04720	4	69	0.381905	0.661097	RPS6KA1|EP300|GNAQ|GRIN2D	http://www.genome.jp/kegg-bin/show_pathway?bta04720/bta:112446776%09red/bta:618181%09red/bta:533908%09red/bta:536654%09red
Sulfur relay system	KEGG PATHWAY	bta04122	1	10	0.382283	0.661097	CTU2	http://www.genome.jp/kegg-bin/show_pathway?bta04122/bta:614194%09red
Gap junction	KEGG PATHWAY	bta04540	5	90	0.385097	0.661097	GNAQ|PRKG1|MAPK7|MAP2K5|GNA11	http://www.genome.jp/kegg-bin/show_pathway?bta04540/bta:282004%09red/bta:536654%09red/bta:537703%09red/bta:100295732%09red/bta:281788%09red
Cardiac muscle contraction	KEGG PATHWAY	bta04260	5	90	0.385097	0.661097	ATP2A1|COX7A1|SLC9A1|COX5B|MYL3	http://www.genome.jp/kegg-bin/show_pathway?bta04260/bta:287012%09red/bta:618352%09red/bta:317654%09red/bta:518117%09red/bta:338086%09red
Cysteine and methionine metabolism	KEGG PATHWAY	bta00270	3	49	0.386066	0.661097	ADI1|ENOPH1|DNMT3A	http://www.genome.jp/kegg-bin/show_pathway?bta00270/bta:359716%09red/bta:615764%09red/bta:525563%09red
Thermogenesis	KEGG PATHWAY	bta04714	12	239	0.39047	0.661097	RPS6KA1|COX5B|PNPLA2|ARID1B|MAP2K3|COX19|SLC25A20|PRKG1|NDUFS7|COX7A1|RHEB|TSC2	http://www.genome.jp/kegg-bin/show_pathway?bta04714/bta:282004%09red/bta:287012%09red/bta:100126182%09red/bta:533908%09red/bta:528204%09red/bta:516039%09red/bta:504985%09red/bta:505229%09red/bta:338086%09red/bta:508493%09red/bta:338079%09red/bta:518758%09red
Autophagy - animal	KEGG PATHWAY	bta04140	7	133	0.393285	0.661097	ULK1|PIK3CA|PIK3CB|MAP3K7|RHEB|TSC2|ATG16L2	http://www.genome.jp/kegg-bin/show_pathway?bta04140/bta:526310%09red/bta:528204%09red/bta:504985%09red/bta:529146%09red/bta:511036%09red/bta:282306%09red/bta:517948%09red
Cholesterol metabolism	KEGG PATHWAY	bta04979	3	50	0.397754	0.661097	PLTP|CD36|ABCA1	http://www.genome.jp/kegg-bin/show_pathway?bta04979/bta:281052%09red/bta:535379%09red/bta:505640%09red
Amino sugar and nucleotide sugar metabolism	KEGG PATHWAY	bta00520	3	50	0.397754	0.661097	AMDHD2|UAP1L1|GALK1	http://www.genome.jp/kegg-bin/show_pathway?bta00520/bta:530855%09red/bta:521401%09red/bta:100299558%09red
Focal adhesion	KEGG PATHWAY	bta04510	10	198	0.400517	0.661097	SHC4|ACTN1|PIK3CA|PIK3CB|ITGA6|ITGA7|MET|ZYX|LAMC1|PAK2	http://www.genome.jp/kegg-bin/show_pathway?bta04510/bta:280855%09red/bta:524734%09red/bta:532572%09red/bta:535043%09red/bta:513673%09red/bta:768226%09red/bta:282306%09red/bta:517948%09red/bta:506953%09red/bta:524770%09red
Huntington disease	KEGG PATHWAY	bta05016	10	198	0.400517	0.661097	TBPL1|TAF4|HAP1|GNAQ|COX5B|TGM2|NDUFS7|COX7A1|EP300|POLR2J	http://www.genome.jp/kegg-bin/show_pathway?bta05016/bta:287012%09red/bta:789854%09red/bta:112446776%09red/bta:540428%09red/bta:613818%09red/bta:338086%09red/bta:338079%09red/bta:618422%09red/bta:536654%09red/bta:281528%09red
Glutamatergic synapse	KEGG PATHWAY	bta04724	6	113	0.401618	0.661097	GNAQ|GNB3|GRIN2D|HOMER3|SLC1A1|SHANK1	http://www.genome.jp/kegg-bin/show_pathway?bta04724/bta:282353%09red/bta:513340%09red/bta:518970%09red/bta:618181%09red/bta:536654%09red/bta:508124%09red
Hypertrophic cardiomyopathy (HCM)	KEGG PATHWAY	bta05410	5	92	0.402206	0.661097	ATP2A1|SGCA|MYL3|ITGA6|ITGA7	http://www.genome.jp/kegg-bin/show_pathway?bta05410/bta:535043%09red/bta:618352%09red/bta:506953%09red/bta:518117%09red/bta:541308%09red
Salivary secretion	KEGG PATHWAY	bta04970	5	93	0.410741	0.668183	RYR3|CATHL5|PRKG1|SLC9A1|GNAQ	http://www.genome.jp/kegg-bin/show_pathway?bta04970/bta:539899%09red/bta:282004%09red/bta:536654%09red/bta:317654%09red/bta:282167%09red
Adipocytokine signaling pathway	KEGG PATHWAY	bta04920	4	72	0.411189	0.668183	JAK2|NFKBIA|STAT3|CD36	http://www.genome.jp/kegg-bin/show_pathway?bta04920/bta:282291%09red/bta:508541%09red/bta:525246%09red/bta:281052%09red
Non-alcoholic fatty liver disease (NAFLD)	KEGG PATHWAY	bta04932	8	158	0.418286	0.675874	COX5B|MLXIPL|PIK3CA|PIK3CB|GSK3A|MLXIP|NDUFS7|COX7A1	http://www.genome.jp/kegg-bin/show_pathway?bta04932/bta:783217%09red/bta:788534%09red/bta:536561%09red/bta:287012%09red/bta:338086%09red/bta:338079%09red/bta:282306%09red/bta:517948%09red
mRNA surveillance pathway	KEGG PATHWAY	bta03015	5	95	0.427755	0.684826	ETF1|PPP2R3A|CSTF1|CPSF1|PPP2R5B	http://www.genome.jp/kegg-bin/show_pathway?bta03015/bta:282703%09red/bta:541077%09red/bta:787607%09red/bta:507051%09red/bta:505915%09red
Calcium signaling pathway	KEGG PATHWAY	bta04020	10	203	0.429459	0.684826	STIM2|ATP2A1|RYR3|PTGFR|CACNA1G|HRH2|GRIN2D|GNA11|P2RX7|GNAQ	http://www.genome.jp/kegg-bin/show_pathway?bta04020/bta:282411%09red/bta:521257%09red/bta:539899%09red/bta:541299%09red/bta:618181%09red/bta:286814%09red/bta:518117%09red/bta:536654%09red/bta:282020%09red/bta:281788%09red
Prion diseases	KEGG PATHWAY	bta05020	2	32	0.431009	0.684826	LAMC1|C8G	http://www.genome.jp/kegg-bin/show_pathway?bta05020/bta:532572%09red/bta:517356%09red
Sphingolipid signaling pathway	KEGG PATHWAY	bta04071	6	120	0.455145	0.712436	GNAQ|PIK3CA|PIK3CB|PPP2R3A|SGMS1|PPP2R5B	http://www.genome.jp/kegg-bin/show_pathway?bta04071/bta:787607%09red/bta:282306%09red/bta:536654%09red/bta:517948%09red/bta:533538%09red/bta:505915%09red
Hepatitis C	KEGG PATHWAY	bta05160	8	164	0.457367	0.712436	TRAF3|STAT3|PIK3CA|PIK3CB|NFKBIA|RB1|IFNAR1|YWHAB	http://www.genome.jp/kegg-bin/show_pathway?bta05160/bta:534712%09red/bta:286863%09red/bta:282291%09red/bta:282257%09red/bta:506182%09red/bta:282306%09red/bta:508541%09red/bta:517948%09red
Taurine and hypotaurine metabolism	KEGG PATHWAY	bta00430	1	13	0.458351	0.712436	GGT1	http://www.genome.jp/kegg-bin/show_pathway?bta00430/bta:615582%09red
Non-homologous end-joining	KEGG PATHWAY	bta03450	1	13	0.458351	0.712436	DCLRE1C	http://www.genome.jp/kegg-bin/show_pathway?bta03450/bta:517886%09red
Dilated cardiomyopathy (DCM)	KEGG PATHWAY	bta05414	5	99	0.461457	0.713387	ATP2A1|SGCA|MYL3|ITGA6|ITGA7	http://www.genome.jp/kegg-bin/show_pathway?bta05414/bta:535043%09red/bta:618352%09red/bta:506953%09red/bta:518117%09red/bta:541308%09red
Chemokine signaling pathway	KEGG PATHWAY	bta04062	9	189	0.476144	0.732135	SHC4|NFKBIA|STAT3|PIK3CA|PIK3CB|GRK5|GSK3A|GNB3|JAK2	http://www.genome.jp/kegg-bin/show_pathway?bta04062/bta:525246%09red/bta:513340%09red/bta:524734%09red/bta:282291%09red/bta:536561%09red/bta:281801%09red/bta:282306%09red/bta:508541%09red/bta:517948%09red
RIG-I-like receptor signaling pathway	KEGG PATHWAY	bta04622	5	102	0.486346	0.743246	CYLD|NFKBIA|TANK|MAP3K7|TRAF3	http://www.genome.jp/kegg-bin/show_pathway?bta04622/bta:536421%09red/bta:282291%09red/bta:539513%09red/bta:529146%09red/bta:506182%09red
beta-Alanine metabolism	KEGG PATHWAY	bta00410	2	36	0.488568	0.743246	SMOX|CARNS1	http://www.genome.jp/kegg-bin/show_pathway?bta00410/bta:527211%09red/bta:783525%09red
Long-term depression	KEGG PATHWAY	bta04730	3	60	0.51005	0.769881	PRKG1|GNAQ|GNA11	http://www.genome.jp/kegg-bin/show_pathway?bta04730/bta:282004%09red/bta:536654%09red/bta:281788%09red
Adrenergic signaling in cardiomyocytes	KEGG PATHWAY	bta04261	7	150	0.51146	0.769881	GNAQ|ATP2A1|PPP2R3A|MYL3|SCN5A|PPP2R5B|SLC9A1	http://www.genome.jp/kegg-bin/show_pathway?bta04261/bta:282061%09red/bta:618352%09red/bta:787607%09red/bta:317654%09red/bta:518117%09red/bta:536654%09red/bta:505915%09red
Arachidonic acid metabolism	KEGG PATHWAY	bta00590	4	83	0.515021	0.771183	PTGDS|GGT1|CYP2U1|CBR3	http://www.genome.jp/kegg-bin/show_pathway?bta00590/bta:615582%09red/bta:286858%09red/bta:516036%09red/bta:535227%09red
Primary immunodeficiency	KEGG PATHWAY	bta05340	2	39	0.529265	0.788385	RFXANK|DCLRE1C	http://www.genome.jp/kegg-bin/show_pathway?bta05340/bta:517886%09red/bta:100125917%09red
B cell receptor signaling pathway	KEGG PATHWAY	bta04662	4	86	0.541885	0.791587	NFATC1|PIK3CB|NFKBIA|PIK3CA	http://www.genome.jp/kegg-bin/show_pathway?bta04662/bta:282306%09red/bta:282291%09red/bta:517948%09red/bta:511224%09red
Nicotine addiction	KEGG PATHWAY	bta05033	2	40	0.542333	0.791587	GABRB3|GRIN2D	http://www.genome.jp/kegg-bin/show_pathway?bta05033/bta:529593%09red/bta:618181%09red
Carbohydrate digestion and absorption	KEGG PATHWAY	bta04973	2	40	0.542333	0.791587	PIK3CA|PIK3CB	http://www.genome.jp/kegg-bin/show_pathway?bta04973/bta:282306%09red/bta:517948%09red
Relaxin signaling pathway	KEGG PATHWAY	bta04926	6	132	0.543686	0.791587	SHC4|TGFBR1|PIK3CA|PIK3CB|NFKBIA|GNB3	http://www.genome.jp/kegg-bin/show_pathway?bta04926/bta:513340%09red/bta:524734%09red/bta:282291%09red/bta:282382%09red/bta:282306%09red/bta:517948%09red
Primary bile acid biosynthesis	KEGG PATHWAY	bta00120	1	17	0.545416	0.791587	ACOX2	http://www.genome.jp/kegg-bin/show_pathway?bta00120/bta:514969%09red
ECM-receptor interaction	KEGG PATHWAY	bta04512	4	87	0.550669	0.791587	LAMC1|CD36|ITGA6|ITGA7	http://www.genome.jp/kegg-bin/show_pathway?bta04512/bta:535043%09red/bta:281052%09red/bta:506953%09red/bta:532572%09red
Vascular smooth muscle contraction	KEGG PATHWAY	bta04270	6	133	0.550789	0.791587	NPR2|GNAQ|CALCRL|ARHGEF1|PRKG1|GNA11	http://www.genome.jp/kegg-bin/show_pathway?bta04270/bta:282004%09red/bta:527140%09red/bta:281357%09red/bta:536654%09red/bta:281788%09red/bta:513377%09red
Alzheimer disease	KEGG PATHWAY	bta05010	8	180	0.558224	0.79826	ATP2A1|COX5B|RYR3|APBB1|GRIN2D|NDUFS7|COX7A1|GNAQ	http://www.genome.jp/kegg-bin/show_pathway?bta05010/bta:287012%09red/bta:505096%09red/bta:539899%09red/bta:618181%09red/bta:338086%09red/bta:518117%09red/bta:338079%09red/bta:536654%09red
Thiamine metabolism	KEGG PATHWAY	bta00730	1	18	0.564902	0.803791	ACP1	http://www.genome.jp/kegg-bin/show_pathway?bta00730/bta:280977%09red
Cell adhesion molecules (CAMs)	KEGG PATHWAY	bta04514	7	159	0.570802	0.805085	JAM2|NLGN1|CD274|CD276|ITGA6|ICAM1|PDCD1	http://www.genome.jp/kegg-bin/show_pathway?bta04514/bta:535043%09red/bta:613842%09red/bta:530042%09red/bta:533834%09red/bta:508656%09red/bta:538846%09red/bta:281839%09red
Mitophagy - animal	KEGG PATHWAY	bta04137	3	66	0.571894	0.805085	PGAM5|PINK1|ULK1	http://www.genome.jp/kegg-bin/show_pathway?bta04137/bta:526310%09red/bta:508608%09red/bta:510683%09red
Ribosome	KEGG PATHWAY	bta03010	7	160	0.577189	0.805085	MRPL35|MRPS9|MRPS6|RPL30|RPL22|RPL15|MRPL19	http://www.genome.jp/kegg-bin/show_pathway?bta03010/bta:540278%09red/bta:510957%09red/bta:616065%09red/bta:519302%09red/bta:507151%09red/bta:513031%09red/bta:615431%09red
Bladder cancer	KEGG PATHWAY	bta05219	2	43	0.58	0.805085	MDM2|RB1	http://www.genome.jp/kegg-bin/show_pathway?bta05219/bta:534712%09red/bta:540378%09red
Pantothenate and CoA biosynthesis	KEGG PATHWAY	bta00770	1	19	0.583554	0.805085	PPCS	http://www.genome.jp/kegg-bin/show_pathway?bta00770/bta:539294%09red
Steroid biosynthesis	KEGG PATHWAY	bta00100	1	19	0.583554	0.805085	MSMO1	http://www.genome.jp/kegg-bin/show_pathway?bta00100/bta:504481%09red
Estrogen signaling pathway	KEGG PATHWAY	bta04915	6	138	0.585516	0.805085	NCOA2|NCOA3|GNAQ|SHC4|PIK3CA|PIK3CB	http://www.genome.jp/kegg-bin/show_pathway?bta04915/bta:524734%09red/bta:508162%09red/bta:282306%09red/bta:536654%09red/bta:517948%09red/bta:523707%09red
African trypanosomiasis	KEGG PATHWAY	bta05143	2	44	0.592038	0.807883	GNAQ|ICAM1	http://www.genome.jp/kegg-bin/show_pathway?bta05143/bta:536654%09red/bta:281839%09red
Morphine addiction	KEGG PATHWAY	bta05032	4	92	0.5932	0.807883	GRK5|GABRB3|PDE8A|GNB3	http://www.genome.jp/kegg-bin/show_pathway?bta05032/bta:506787%09red/bta:281801%09red/bta:529593%09red/bta:513340%09red
GnRH signaling pathway	KEGG PATHWAY	bta04912	4	93	0.601415	0.814583	MAP2K3|GNAQ|MAPK7|GNA11	http://www.genome.jp/kegg-bin/show_pathway?bta04912/bta:516039%09red/bta:536654%09red/bta:537703%09red/bta:281788%09red
Ferroptosis	KEGG PATHWAY	bta04216	2	45	0.603817	0.814583	MAP1LC3A|SLC40A1	http://www.genome.jp/kegg-bin/show_pathway?bta04216/bta:527023%09red/bta:514547%09red
Fc epsilon RI signaling pathway	KEGG PATHWAY	bta04664	3	70	0.610322	0.819493	MAP2K3|PIK3CA|PIK3CB	http://www.genome.jp/kegg-bin/show_pathway?bta04664/bta:282306%09red/bta:516039%09red/bta:517948%09red
Endocrine and other factor-regulated calcium reabsorption	KEGG PATHWAY	bta04961	2	46	0.615336	0.822365	DNM1|GNAQ	http://www.genome.jp/kegg-bin/show_pathway?bta04961/bta:508794%09red/bta:536654%09red
Aldosterone synthesis and secretion	KEGG PATHWAY	bta04925	4	96	0.625448	0.825127	CACNA1G|GNA11|GNAQ|PRKD3	http://www.genome.jp/kegg-bin/show_pathway?bta04925/bta:536654%09red/bta:282411%09red/bta:538447%09red/bta:281788%09red
Mineral absorption	KEGG PATHWAY	bta04978	2	47	0.626596	0.825127	STEAP2|SLC40A1	http://www.genome.jp/kegg-bin/show_pathway?bta04978/bta:527023%09red/bta:504616%09red
Platelet activation	KEGG PATHWAY	bta04611	5	121	0.631738	0.825127	PIK3CA|PIK3CB|PRKG1|GNAQ|ARHGEF1	http://www.genome.jp/kegg-bin/show_pathway?bta04611/bta:282306%09red/bta:282004%09red/bta:536654%09red/bta:517948%09red/bta:513377%09red
Pancreatic secretion	KEGG PATHWAY	bta04972	4	97	0.633251	0.825127	RAB3D|SLC9A1|GNAQ|ATP2A1	http://www.genome.jp/kegg-bin/show_pathway?bta04972/bta:536654%09red/bta:317654%09red/bta:100139105%09red/bta:518117%09red
Glycosaminoglycan degradation	KEGG PATHWAY	bta00531	1	22	0.634851	0.825127	GALNS	http://www.genome.jp/kegg-bin/show_pathway?bta00531/bta:515809%09red
Biosynthesis of amino acids	KEGG PATHWAY	bta01230	3	73	0.637584	0.825127	GPT|ACY1|PFKP	http://www.genome.jp/kegg-bin/show_pathway?bta01230/bta:539188%09red/bta:507119%09red/bta:768058%09red
Fat digestion and absorption	KEGG PATHWAY	bta04975	2	48	0.637598	0.825127	CD36|ABCA1	http://www.genome.jp/kegg-bin/show_pathway?bta04975/bta:281052%09red/bta:535379%09red
Mannose type O-glycan biosynthesis	KEGG PATHWAY	bta00515	1	23	0.650506	0.834281	B4GALT1	http://www.genome.jp/kegg-bin/show_pathway?bta00515/bta:281781%09red
Histidine metabolism	KEGG PATHWAY	bta00340	1	23	0.650506	0.834281	CARNS1	http://www.genome.jp/kegg-bin/show_pathway?bta00340/bta:783525%09red
Neuroactive ligand-receptor interaction	KEGG PATHWAY	bta04080	15	363	0.655915	0.837463	LPAR2|PTGFR|GRID1|GRIN2D|GHR|CALCRL|CHRNB1|SST|PTGDR|HRH2|CHRNG|CHRNA2|HCRTR1|GABRB3|P2RX7	http://www.genome.jp/kegg-bin/show_pathway?bta04080/bta:531838%09red/bta:527140%09red/bta:521257%09red/bta:509748%09red/bta:282179%09red/bta:618181%09red/bta:529593%09red/bta:515331%09red/bta:280932%09red/bta:286814%09red/bta:281689%09red/bta:282020%09red/bta:282248%09red/bta:280805%09red/bta:100337106%09red
Viral myocarditis	KEGG PATHWAY	bta05416	3	76	0.663482	0.840743	SGCA|ICAM1|CD55	http://www.genome.jp/kegg-bin/show_pathway?bta05416/bta:518609%09red/bta:281839%09red/bta:541308%09red
Glycosaminoglycan biosynthesis - heparan sulfate / heparin	KEGG PATHWAY	bta00534	1	24	0.665491	0.840743	EXTL2	http://www.genome.jp/kegg-bin/show_pathway?bta00534/bta:540527%09red
Valine, leucine and isoleucine degradation	KEGG PATHWAY	bta00280	2	51	0.669074	0.840743	HMGCL|ACAA2	http://www.genome.jp/kegg-bin/show_pathway?bta00280/bta:522006%09red/bta:317658%09red
Oxytocin signaling pathway	KEGG PATHWAY	bta04921	6	152	0.674712	0.840743	NFATC1|NPR2|GNAQ|RYR3|MAPK7|MAP2K5	http://www.genome.jp/kegg-bin/show_pathway?bta04921/bta:281357%09red/bta:539899%09red/bta:537703%09red/bta:100295732%09red/bta:536654%09red/bta:511224%09red
Retrograde endocannabinoid signaling	KEGG PATHWAY	bta04723	6	152	0.674712	0.840743	FAAH|GNAQ|GNB3|NDUFS7|GABRB3|ABHD6	http://www.genome.jp/kegg-bin/show_pathway?bta04723/bta:540007%09red/bta:513340%09red/bta:505283%09red/bta:529593%09red/bta:338079%09red/bta:536654%09red
Inflammatory mediator regulation of TRP channels	KEGG PATHWAY	bta04750	4	103	0.677823	0.840743	MAP2K3|PIK3CA|PIK3CB|GNAQ	http://www.genome.jp/kegg-bin/show_pathway?bta04750/bta:282306%09red/bta:516039%09red/bta:536654%09red/bta:517948%09red
Ether lipid metabolism	KEGG PATHWAY	bta00565	2	52	0.679062	0.840743	SELENOI|PLD3	http://www.genome.jp/kegg-bin/show_pathway?bta00565/bta:613932%09red/bta:506381%09red
Glycosylphosphatidylinositol (GPI)-anchor biosynthesis	KEGG PATHWAY	bta00563	1	26	0.693561	0.851324	PIGN	http://www.genome.jp/kegg-bin/show_pathway?bta00563/bta:525095%09red
Renin-angiotensin system	KEGG PATHWAY	bta04614	1	26	0.693561	0.851324	ANPEP	http://www.genome.jp/kegg-bin/show_pathway?bta04614/bta:404191%09red
Dopaminergic synapse	KEGG PATHWAY	bta04728	5	132	0.703366	0.859669	GNB3|PPP2R3A|GSK3A|GNAQ|PPP2R5B	http://www.genome.jp/kegg-bin/show_pathway?bta04728/bta:536561%09red/bta:536654%09red/bta:787607%09red/bta:513340%09red/bta:505915%09red
Spliceosome	KEGG PATHWAY	bta03040	5	133	0.709369	0.863317	PRPF18|HNRNPA1|DHX16|CHERP|SF3A2	http://www.genome.jp/kegg-bin/show_pathway?bta03040/bta:506405%09red/bta:789082%09red/bta:505093%09red/bta:507639%09red/bta:525110%09red
Pentose phosphate pathway	KEGG PATHWAY	bta00030	1	28	0.719278	0.870933	PFKP	http://www.genome.jp/kegg-bin/show_pathway?bta00030/bta:507119%09red
alpha-Linolenic acid metabolism	KEGG PATHWAY	bta00592	1	29	0.731316	0.870933	FADS2	http://www.genome.jp/kegg-bin/show_pathway?bta00592/bta:521822%09red
Fatty acid elongation	KEGG PATHWAY	bta00062	1	29	0.731316	0.870933	ACAA2	http://www.genome.jp/kegg-bin/show_pathway?bta00062/bta:522006%09red
Salmonella infection	KEGG PATHWAY	bta05132	3	85	0.732978	0.870933	KLC3|KLC4|IFNGR1	http://www.genome.jp/kegg-bin/show_pathway?bta05132/bta:508619%09red/bta:767885%09red/bta:517633%09red
VEGF signaling pathway	KEGG PATHWAY	bta04370	2	58	0.733898	0.870933	PIK3CA|PIK3CB	http://www.genome.jp/kegg-bin/show_pathway?bta04370/bta:282306%09red/bta:517948%09red
Fatty acid metabolism	KEGG PATHWAY	bta01212	2	58	0.733898	0.870933	ACAA2|FADS2	http://www.genome.jp/kegg-bin/show_pathway?bta01212/bta:522006%09red/bta:521822%09red
RNA transport	KEGG PATHWAY	bta03013	6	164	0.740579	0.872898	XPO1|RPP40|EIF3B|RAE1|THOC7|NUP205	http://www.genome.jp/kegg-bin/show_pathway?bta03013/bta:789999%09red/bta:510568%09red/bta:531274%09red/bta:513080%09red/bta:510250%09red/bta:520924%09red
Biosynthesis of unsaturated fatty acids	KEGG PATHWAY	bta01040	1	30	0.742838	0.872898	FADS2	http://www.genome.jp/kegg-bin/show_pathway?bta01040/bta:521822%09red
Complement and coagulation cascades	KEGG PATHWAY	bta04610	3	87	0.746784	0.872898	F3|CD55|C8G	http://www.genome.jp/kegg-bin/show_pathway?bta04610/bta:518609%09red/bta:517356%09red/bta:280686%09red
Oxidative phosphorylation	KEGG PATHWAY	bta00190	5	140	0.748988	0.872898	TCIRG1|COX7A1|ATP6V0A1|COX5B|NDUFS7	http://www.genome.jp/kegg-bin/show_pathway?bta00190/bta:513684%09red/bta:287012%09red/bta:286768%09red/bta:338086%09red/bta:338079%09red
Mucin type O-glycan biosynthesis	KEGG PATHWAY	bta00512	1	31	0.753867	0.872898	GALNT7	http://www.genome.jp/kegg-bin/show_pathway?bta00512/bta:524529%09red
Circadian rhythm	KEGG PATHWAY	bta04710	1	31	0.753867	0.872898	RORA	http://www.genome.jp/kegg-bin/show_pathway?bta04710/bta:535597%09red
Apoptosis	KEGG PATHWAY	bta04210	5	142	0.75954	0.875921	PIK3CA|PIK3CB|NFKBIA|CTSF|LMNB1	http://www.genome.jp/kegg-bin/show_pathway?bta04210/bta:509715%09red/bta:282291%09red/bta:517948%09red/bta:282306%09red/bta:540643%09red
Longevity regulating pathway - multiple species	KEGG PATHWAY	bta04213	2	62	0.765857	0.876778	PIK3CA|PIK3CB	http://www.genome.jp/kegg-bin/show_pathway?bta04213/bta:282306%09red/bta:517948%09red
GABAergic synapse	KEGG PATHWAY	bta04727	3	90	0.766414	0.876778	GABRB3|HAP1|GNB3	http://www.genome.jp/kegg-bin/show_pathway?bta04727/bta:529593%09red/bta:618422%09red/bta:513340%09red
Glycolysis / Gluconeogenesis	KEGG PATHWAY	bta00010	2	64	0.780548	0.886483	MINPP1|PFKP	http://www.genome.jp/kegg-bin/show_pathway?bta00010/bta:541067%09red/bta:507119%09red
Apoptosis - multiple species	KEGG PATHWAY	bta04215	1	34	0.784196	0.886483	BIRC6	http://www.genome.jp/kegg-bin/show_pathway?bta04215/bta:534211%09red
Fructose and mannose metabolism	KEGG PATHWAY	bta00051	1	34	0.784196	0.886483	PFKP	http://www.genome.jp/kegg-bin/show_pathway?bta00051/bta:507119%09red
Metabolism of xenobiotics by cytochrome P450	KEGG PATHWAY	bta00980	2	67	0.801066	0.901988	GSTM1|CBR3	http://www.genome.jp/kegg-bin/show_pathway?bta00980/bta:783879%09red/bta:516036%09red
Asthma	KEGG PATHWAY	bta05310	1	38	0.818907	0.918461	RNASE2	http://www.genome.jp/kegg-bin/show_pathway?bta05310/bta:100125948%09red
Staphylococcus aureus infection	KEGG PATHWAY	bta05150	2	75	0.847671	0.943423	CATHL5|ICAM1	http://www.genome.jp/kegg-bin/show_pathway?bta05150/bta:282167%09red/bta:281839%09red
Fatty acid degradation	KEGG PATHWAY	bta00071	1	42	0.848039	0.943423	ACAA2	http://www.genome.jp/kegg-bin/show_pathway?bta00071/bta:522006%09red
Glycine, serine and threonine metabolism	KEGG PATHWAY	bta00260	1	43	0.854558	0.943423	GCAT	http://www.genome.jp/kegg-bin/show_pathway?bta00260/bta:319141%09red
p53 signaling pathway	KEGG PATHWAY	bta04115	2	77	0.857657	0.943423	MDM2|TSC2	http://www.genome.jp/kegg-bin/show_pathway?bta04115/bta:504985%09red/bta:540378%09red
Chemical carcinogenesis	KEGG PATHWAY	bta05204	2	77	0.857657	0.943423	GSTM1|NAT1	http://www.genome.jp/kegg-bin/show_pathway?bta05204/bta:783879%09red/bta:512603%09red
Taste transduction	KEGG PATHWAY	bta04742	2	79	0.867041	0.950091	GNB3|PKD1L3	http://www.genome.jp/kegg-bin/show_pathway?bta04742/bta:100138604%09red/bta:513340%09red
Proteasome	KEGG PATHWAY	bta03050	1	46	0.872487	0.951785	PSMB8	http://www.genome.jp/kegg-bin/show_pathway?bta03050/bta:282013%09red
Protein digestion and absorption	KEGG PATHWAY	bta04974	3	113	0.878752	0.951785	COL18A1|COL5A3|SLC1A1	http://www.genome.jp/kegg-bin/show_pathway?bta04974/bta:508076%09red/bta:282353%09red/bta:507881%09red
Cocaine addiction	KEGG PATHWAY	bta05030	1	48	0.883195	0.951785	GRIN2D	http://www.genome.jp/kegg-bin/show_pathway?bta05030/bta:618181%09red
Bile secretion	KEGG PATHWAY	bta04976	2	83	0.884125	0.951785	SLC9A1|HMGCR	http://www.genome.jp/kegg-bin/show_pathway?bta04976/bta:317654%09red/bta:407159%09red
Vasopressin-regulated water reabsorption	KEGG PATHWAY	bta04962	1	49	0.888207	0.951785	ARHGDIA	http://www.genome.jp/kegg-bin/show_pathway?bta04962/bta:338054%09red
Serotonergic synapse	KEGG PATHWAY	bta04726	3	116	0.889159	0.951785	GABRB3|GNAQ|GNB3	http://www.genome.jp/kegg-bin/show_pathway?bta04726/bta:529593%09red/bta:536654%09red/bta:513340%09red
Insulin secretion	KEGG PATHWAY	bta04911	2	85	0.891883	0.951785	GNAQ|GNA11	http://www.genome.jp/kegg-bin/show_pathway?bta04911/bta:536654%09red/bta:281788%09red
Parkinson disease	KEGG PATHWAY	bta05012	4	150	0.900345	0.957244	PINK1|COX7A1|COX5B|NDUFS7	http://www.genome.jp/kegg-bin/show_pathway?bta05012/bta:287012%09red/bta:338086%09red/bta:510683%09red/bta:338079%09red
Viral protein interaction with cytokine and cytokine receptor	KEGG PATHWAY	bta04061	2	95	0.923916	0.978666	ACKR4|IL18R1	http://www.genome.jp/kegg-bin/show_pathway?bta04061/bta:281672%09red/bta:407221%09red
Type I diabetes mellitus	KEGG PATHWAY	bta04940	1	59	0.927905	0.978919	PTPRN	http://www.genome.jp/kegg-bin/show_pathway?bta04940/bta:286810%09red
ABC transporters	KEGG PATHWAY	bta02010	1	60	0.931	0.978919	ABCA1	http://www.genome.jp/kegg-bin/show_pathway?bta02010/bta:535379%09red
Drug metabolism - cytochrome P450	KEGG PATHWAY	bta00982	1	63	0.93951	0.979803	GSTM1	http://www.genome.jp/kegg-bin/show_pathway?bta00982/bta:783879%09red
Retinol metabolism	KEGG PATHWAY	bta00830	1	64	0.942107	0.979803	RDH10	http://www.genome.jp/kegg-bin/show_pathway?bta00830/bta:282852%09red
Phagosome	KEGG PATHWAY	bta04145	4	170	0.943366	0.979803	TCIRG1|TLR2|ATP6V0A1|CD36	http://www.genome.jp/kegg-bin/show_pathway?bta04145/bta:513684%09red/bta:281052%09red/bta:281534%09red/bta:286768%09red
Amphetamine addiction	KEGG PATHWAY	bta05031	1	67	0.949249	0.979803	GRIN2D	http://www.genome.jp/kegg-bin/show_pathway?bta05031/bta:618181%09red
Tight junction	KEGG PATHWAY	bta04530	4	178	0.955207	0.979803	PARD6G|ACTN1|JAM2|EZR	http://www.genome.jp/kegg-bin/show_pathway?bta04530/bta:281574%09red/bta:538846%09red/bta:539292%09red/bta:524770%09red
Renin secretion	KEGG PATHWAY	bta04924	1	72	0.959249	0.979803	GNAQ	http://www.genome.jp/kegg-bin/show_pathway?bta04924/bta:536654%09red
Systemic lupus erythematosus	KEGG PATHWAY	bta05322	4	182	0.96023	0.979803	ACTN1|HIST2H2AC|HIST1H2BB|C8G	http://www.genome.jp/kegg-bin/show_pathway?bta05322/bta:513666%09red/bta:517356%09red/bta:524770%09red/bta:525512%09red
Carbon metabolism	KEGG PATHWAY	bta01200	2	113	0.960276	0.979803	GPT|PFKP	http://www.genome.jp/kegg-bin/show_pathway?bta01200/bta:539188%09red/bta:507119%09red
Thyroid hormone synthesis	KEGG PATHWAY	bta04918	1	74	0.962674	0.979803	GNAQ	http://www.genome.jp/kegg-bin/show_pathway?bta04918/bta:536654%09red
Pertussis	KEGG PATHWAY	bta05133	1	77	0.967279	0.980296	IL23A	http://www.genome.jp/kegg-bin/show_pathway?bta05133/bta:511022%09red
Alcoholism	KEGG PATHWAY	bta05034	5	224	0.970013	0.980296	SHC4|GRIN2D|GNB3|HIST2H2AC|HIST1H2BB	http://www.genome.jp/kegg-bin/show_pathway?bta05034/bta:513666%09red/bta:618181%09red/bta:513340%09red/bta:524734%09red/bta:525512%09red
Protein processing in endoplasmic reticulum	KEGG PATHWAY	bta04141	3	165	0.976873	0.980399	SYVN1|PLAA|MBTPS1	http://www.genome.jp/kegg-bin/show_pathway?bta04141/bta:511682%09red/bta:506073%09red/bta:508358%09red
Antigen processing and presentation	KEGG PATHWAY	bta04612	1	85	0.976971	0.980399	RFXANK	http://www.genome.jp/kegg-bin/show_pathway?bta04612/bta:100125917%09red
Olfactory transduction	KEGG PATHWAY	bta04740	1	1161	1	1	PRKG1	http://www.genome.jp/kegg-bin/show_pathway?bta04740/bta:282004%09red
